1 **INTERANNUAL TEMPORAL PATTERNS OF DESOTO CANYON**  
2 **MACROFAUNA AND EVALUATION OF INFLUENCE FROM THE**  
3 **DEEPWATER HORIZON**

4

5 Authors:

6 1. Arvind K. Shantharam<sup>1</sup>

7 2. Amy R. Baco<sup>1,\*</sup>

8

9

10

11

12

13

14

15

16

17

18 \* - corresponding author, [abacotaylor@fsu.edu](mailto:abacotaylor@fsu.edu)

19 1 – Florida State University, Department of Earth, Ocean, and Atmospheric Sciences, 1011

20 Academic Way, Tallahassee, FL 32306

21

22 **Abstract**

23

24 Submarine canyons are highly dynamic and productive ecosystems, but time-series  
25 studies of metazoan benthic communities in canyons are scarce. Deep-sea macrofauna from the  
26 DeSoto Canyon in the northern Gulf of Mexico were sampled annually from 2012 through 2014  
27 from five stations within the Canyon and from two stations in 2013 and 2014 on the adjacent  
28 open slope, for analysis of interannual dynamics, temporal variability, and potential influence of  
29 the Deepwater Horizon oil spill (DwH), which occurred nearby in 2010. At a few sites, elevated  
30 abundance was observed at the start of the time-series for overall macrofauna and for deposit  
31 feeder abundance. However, diversity metrics showed no difference within stations among time  
32 points. Community and feeding guild structure varied by station, as expected, but showed no  
33 statistical difference among time points within a station. Some temporal variability was visible  
34 in temporal trajectory overlays. Cluster analyses showed grouping more by station than by time  
35 point. Metrics utilized for measuring potential oil contamination impact and overall community  
36 stress including the benthic polychaete/amphipod ratio, feeding guild abundance, macrofaunal  
37 indicators designed from the DwH, and community dispersion, generally exhibited a paucity of  
38 evidence of impact, both yearly and with site-to-site comparisons. This suggests low levels of  
39 impact in the canyon consistent with the low deposition of hydrocarbons, the timing of sampling,  
40 and quick recovery of canyon foraminifera. Taken together these results suggest relatively low  
41 levels of temporal variability within the DeSoto Canyon macrofauna with little evidence of oil  
42 influence on these sites within the studied time range.

## 43 I. Introduction

44 Despite its seemingly quiescent nature, closer inspection of the deep-sea indicates natural  
45 temporal variability that can be linked to seasonal and stochastic events, e.g. surface primary  
46 productivity changes, climate, sediment slumping, and sediment resuspension from benthic storms  
47 (reviewed by Smith et al. 2009; Glover et al. 2010). Not surprisingly, natural variations in deep-  
48 sea fauna through time have also been tied to this environmental variability, with fluctuations in  
49 abundance and diversity as well as species composition (Glover et al., 2010 and references therein;  
50 Laguionie-Marchais et al., 2013; Ramalho et al., 2014; Rogers 2015). Ecological processes such  
51 as succession, disturbance, and recovery can also contribute to fluctuations in abundance and  
52 community structure in deep-sea benthic communities over time (Smith 1986; Kukert and Smith  
53 1992; Young and Richardson 1998; Smith et al. 2002; Bernardino et al. 2010).

54 From a basic science perspective, since the deep sea varies through time in both  
55 environmental and faunal patterns, characterizing the range of these natural variations is critical to  
56 our understanding of deep-sea ecology. In a more applied context, quantifying the natural range of  
57 variation in deep benthic populations through time also provides a baseline for assessing natural  
58 and anthropogenic disturbances. Once the normal variation of a system has been quantified, this  
59 data can act as a baseline to assess whether any observed changes can be attributed to a disturbance  
60 event or to natural variability. However, in the most recent review of deep-sea time-series studies,  
61 Glover et al. (2010) found there were only 11 deep-sea sedimented ecosystems with multi-year  
62 time-series studies, of which only 2 were longer than 5 years. Thus, the paucity of time-series  
63 studies in the deep ocean makes it hard to determine whether changes observed after a human  
64 impact are caused by the impact, or a part of the natural variation of the system. The lack of data  
65 also leads to an inability to predict whether the effects from disturbances will be prolonged or  
66 ephemeral.

67           Increasing human-induced, large-scale disturbances have accentuated the imperative for  
68 more time-series studies to allow comparisons and prediction of impact outcomes (Glover and  
69 Smith 2003; Ramirez-Llodra et al. 2011; Mengerink et al. 2014). Highly dynamic, ecologically  
70 important environments such as submarine canyons in particular, need more focused studies as  
71 they are noted to be hotspots of diversity, with large spatial and biogeochemical heterogeneity. In  
72 the last decade, canyons have increasingly become targets for bottom-trawling fisheries, are  
73 exploited for oil and gas exploration, are sinks for litter and chemical pollution, and the biota  
74 inhabiting them may be sensitive to the effects of climate change over time (Fernandez-Arcaya et  
75 al. 2017; De Leo and Puig 2018).

76           The DeSoto Canyon is a major topographic feature of the northern Gulf of Mexico  
77 (NGOM). Environmentally, it stands as a noted sedimentary transition zone (Antoine and Bryant  
78 1968), which can accumulate high amounts of organic matter (Morse and Beazley 2008; Silva  
79 2017; Wei and Rowe 2019), and potentially has a strong hydrodynamic regime given its inherent  
80 topography (Clarke and Van Gorder 2016). Ecologically, it is recognized as a hotspot of  
81 meiofaunal and macrofaunal benthic abundance (Baguley et al. 2006; Wei et al. 2010, Shantharam  
82 et al in revision), benthic diversity (Wicksten and Packard, 2005), and biomass (Wei et al. 2012).  
83 To date, however, the temporal dynamics of resident macrofauna in this canyon have not been  
84 characterized, leaving a gap in baseline knowledge on how biota of this important bathymetric  
85 feature behaves ecologically through time. It has been shown that the larger NGOM macrobenthos  
86 seems subject to some interannual variability in abundance (Montagna et al. 2020) and community  
87 structure (Salcedo et al. 2016). Thus, the primary goal of this study was to test the null hypothesis  
88 that macrofauna in more localized ecosystems like the DeSoto Canyon exhibit interannual

89 variability similar to non-canyon sites and that individual locations exhibit similar inter-year  
90 patterns.

91         Given the proximity of the DeSoto Canyon to the Deepwater Horizon oil spill (DwH), it is  
92 necessary to also consider whether any of the study sites were influenced by the spill. DwH was  
93 the largest oil spill in United States history and the first in the deep sea (wellhead depth 1500m).  
94 The infaunal impact in the area immediately around the DwH wellhead was extensive and impacts  
95 have been long-lasting (Montagna et al. 2013; Baguley et al. 2015; Montagna et al. 2016; Reuscher  
96 et al. 2017; Washburn et al. 2017). Further away, the picture is less clear. In the DeSoto Canyon,  
97 40 – 185 km from the wellhead, rapidly deposited labile and non-labile hydrocarbon sedimentation  
98 was confirmed in sites throughout the canyon (Brooks et al. 2015). Impacts to sediment ecosystems  
99 included changes to the redoxcline, similar to an influx of enriched organic matter, from 2010 –  
100 2013 (Brooks et al. 2015; Hastings et al. 2015). Oil-degrading bacteria in sediments near the deeper  
101 plumes spiked in September/October 2010 and in the summer seasons of 2012 – 2014 (Mason et  
102 al. 2014; Overholt 2018). Impacts to local benthic meiofauna were inferred from the drop in  
103 foraminiferan density and diversity, and overall sediment bioturbation (Schwing et al. 2013;  
104 Brooks et al. 2015; Schwing et al. 2015; Schwing et al. 2017).

105         By 2014 – 2016, the impacts to DeSoto Canyon ecosystems may have subsided.  
106 Perturbations to phytoplankton productivity at the initiation of the DwH mostly abated by 2014  
107 and 2015 (Li et al. 2019). Signs of the mass deposition event in the canyon had ended by 2013 -  
108 2016 (Larson et al. 2018). Bacterial communities in canyon sediment may have returned to  
109 baseline conditions by 2015 (Yang et al. 2016; Liu et al. 2017; Overholt et al. 2019) as bioturbation  
110 recommenced between 2013 – 2016 (Larson et al. 2018) and the redoxcline resumed steady-state  
111 conditions (Hastings et al. 2020). Additionally, canyon foraminiferan diversity rose and steadied

112 by 2012 (Schwing et al. 2017; Schwing et al. 2018; Schwing and Machain-Castillo 2020).  
113 However, foraminiferans only comprise a small portion of the benthic fauna occupying this soft  
114 sediment ecosystem, leaving many facets of metazoan abundance, diversity and structure  
115 unexplored. Thus, with macrofauna sampled during the summer of 2012 – 2014 in the DeSoto  
116 Canyon, and adjacent continental slope, a further goal of this study was to test whether any  
117 observed temporal variability might be attributable to influence from the oil spill and to compare  
118 observations between communities in the canyon to those on the non-canyon slope.

119

## 120 **II. Materials and methods**

121

### 122 *2.1 Study location*

123 The DeSoto Canyon is an S-shaped canyon located on the edge of the NW Florida outer  
124 continental shelf, cutting from the shelf to the abyssal region of the Gulf of Mexico (GOM). It is  
125 a sedimentary ecotone with siliclastic clays to the west and biogenic carbonates to the east  
126 (Gould and Stewart, 1955; Doyle and Sparks, 1980). Sediment accumulates at a rate of ~17  
127 cm/ky (Emiliani et al., 1975) in the northwest and ~10 cm/ky in the southeast (Emiliani et al.,  
128 1975; Nürnberg et al., 2008) of the canyon. In the summer season, the head of the canyon is  
129 occupied by low salinity, biologically productive waters, driven there by cyclonic and  
130 anticyclonic eddies (Müller-Karger et al., 1991; Belabbassi et al., 2005; Walker et al., 2005;  
131 Biggs et al., 2008; Jochens and DiMarco, 2008). Strong thermohaline stratification prevents  
132 further intrusion, leaving highly oxygenated water typical of the North Atlantic Deepwater  
133 (NADW) to be the predominant water mass in the deeper (>1000 m) reaches of the canyon

134 (Rivas et al., 2005; Morse and Beazley, 2008). Further detail on habitat characteristics are  
135 reviewed in Shantharam et al (in revision).

136

## 137 *2.2 Relation to the Deepwater Horizon deposition*

138 The DeSoto Canyon is located ~40 – 185 km east/southeast of the DwH wellhead (Fig 1)  
139 and towards the eastern edge of the total estimated 24,000 km<sup>2</sup> depositional footprint of the oil  
140 spill (Chanton et al. 2014). The extent of the surface slick in relation to the canyon is depicted in  
141 Figure 1A. Plumes from the DwH spill were detected within the DeSoto Canyon at ~400, ~1000,  
142 and 1400 m depths in 2010 (Hollander et al. 2012). Within a year after the spill, rapid deposition  
143 of soluble and insoluble hydrocarbons was observed. Sediment hydrocarbon concentrations  
144 increased five times more than pre-spill levels (Romero et al. 2015; Romero et al. 2017). The  
145 distribution of radiocarbon (<sup>14</sup>C) of DeSoto Canyon seafloor sediments is presented in Fig 1B,  
146 more depleted values are indicative of petrocarbon from the DwH. These mostly comprised  
147 degraded, high molecular weight compounds n-alkanes (67%), low molecular weight n-alkanes  
148 (9%) and low weight PAHs (6%). This composition remained relatively unchanged for 3 years  
149 though large reductions in concentrations did occur for homohopanes (~67%) and low weight  
150 compounds (n-alkanes and PAHs, ~65% and ~66% respectively) and to a lesser degree high  
151 molecular weight n-alkanes (~43%) and PAHs (~12%) (Romero et al. 2020). Most of the  
152 deposition of this material seems to be concentrated west of the Canyon, but a few patches are  
153 observed in Fig 1B within the canyon.

154

## 155 *2.2 Sampling*

156 Samples were collected during the *R/V Weatherbird II* cruise numbers WB1305,  
157 WB1306, WB1405, and WB1411. Sampling in 2012 and 2013 took place in late August to early

158 September and sampling in 2014 from late June to early July. Five sites within the DeSoto  
159 Canyon, PCB06, XC2, XC3, S36, and XC4 were sampled (Figure 1). Three sites, PCB06, S36,  
160 and XC4, were sampled annually within the study period and XC2 and XC3 were only sampled  
161 in 2012 and 2014 (due to weather in 2013 and equipment malfunctions) (Table 1). Two sites on  
162 the adjacent eastern non-canyon slope, expected to be fully outside the oil influence, were also  
163 sampled in 2013 and 2014: S42 and NT800 (Table 1, Fig 1). Only site XC4 shows potential spill  
164 influence based on the Chanton et al. (2014) data (Fig 1B). However, all canyon sites fall under  
165 the surface footprint of the oil slick. XC2, PCB06, and XC3 of this study were also shown to  
166 have had direct deposition in 2010 (XC2 and PCB06) and 2011 (XC3) (Romero et al. 2015).

167 Sediment at each site was collected using an Ocean Instruments MC-800 multicorer  
168 capable of collecting up to eight, 10-cm diameter by 70-cm long cores per deployment. Four  
169 cores from three replicate deployments at each site were processed for resident macrofauna  
170 (*sensu stricto*), except for NT800 in 2013 where equipment malfunctions allowed only two  
171 successful deployments. The top 10 cm of each core was sectioned into 0 – 1, 1 – 5, and 5 – 10  
172 cm depth fractions and fixed in buffered 10% formalin. Once returned to the laboratory,  
173 macrofauna were sieved through a 300  $\mu$ m sieve and stained with Rose Bengal, then preserved in  
174 70% ethanol. Once extracted, macrofaunal specimens were identified (usually to family), and  
175 enumerated for subsequent analyses. Family level classification is generally regarded as  
176 sufficient to discern multivariate faunal patterns in marine ecosystems (Warwick 1988,  
177 Narayanaswamy et al. 2003) and in oil impact assessments (Gomez Gesteira et al., 2003).

178  
179

### 180 *2.3 Statistical analyses*



181 For all statistical analyses, the four cores from each deployment were combined and  
182 treated as one sample, with each deployment considered a replicate for that site in that year. This  
183 study focuses on temporal variation within sites while Shantharam et al (in revision) focuses on  
184 spatial variation among sites with a larger set of sites sampled throughout the canyon and  
185 adjacent slope in 2014. Thus all statistical analyses are designed specifically to test for temporal  
186 change within a site. Standard abundance and diversity metrics (species richness and Pielou's  
187 evenness ( $J'$ )) were computed for each sample using the DIVERSE routine in Primer v 7.0.13  
188 (Clarke and Gorley 2015). To test for changes in trophic structure, macrofaunal taxa were  
189 assigned to feeding guilds adapted from Demopoulos et al. (2014), which included carnivore,  
190 omnivore, deposit feeder, suspension feeder, and species harboring chemosymbiotic bacteria.  
191 Abundance values were square root transformed and Bray-Curtis similarity was calculated to  
192 measure macrofaunal community and feeding guild structure using group-average clustering.  
193 These were portrayed with non-metric multidimensional scaling (NMDS) and cluster diagrams.  
194 Samples were then summed across replicates within years and ordinated with a trajectory  
195 through time overlaid to depict temporal change in community structure.

196 For tests of macrofaunal abundance, diversity, and community structure, a two-way  
197 Permutational Analysis of Variance (PERMANOVA) (Anderson et al. 2008) was performed  
198 with time point as a fixed factor and station as a random factor followed by pairwise  
199 comparisons.

200

#### 201 *2.4 Bioindicators of oil influence*

202 Additional oil-impact faunal metrics that might provide insights into any effects of the oil  
203 spill were incorporated into the statistical analyses. The first of these is a bioindicator known as

204 the benthic polychaete/amphipod ratio (BPA) (Andrade and Renaud 2011), which was designed  
205 for gauging benthic impact of offshore oil and gas production in shallow water. There are no  
206 thresholds or definitive measures of impact, rather it contrasts the ratio in contaminated areas to  
207 non-contaminated areas to indicate community differences due to pollution. Higher values  
208 indicate a greater impact due to the increased presence of opportunistic polychaetes and  
209 reduction of sensitive amphipods.

210 The second set of indicators used were a set of designations of macrofauna taxa in terms  
211 of their tolerance to or sensitivity to oil, that were developed in the context of the DwH closer to  
212 the wellhead (Washburn et al. 2016). From a known oil spill impact zone, Washburn et al.  
213 (2016), using taxa identified to the family level, designated families as “pollution tolerant” if  
214 they were significantly higher in abundance and “pollution sensitive” if significantly lower in  
215 abundance in the oil impact zone. If taxa were close to being significantly different between  
216 impact and non-impact zones and abundances were at least 50% higher in one zone versus the  
217 other, they were deemed “possibly tolerant” or “possibly sensitive”. Taxa that did not  
218 demonstrate a significant difference from background were termed “cosmopolitan”. Collectively,  
219 these groups are hereafter termed DwH macrofaunal indicators. In the setup of the current study,  
220 these were assigned to the abundance data and the ratio of these groups to the total macrofaunal  
221 abundance of a sample were determined. The results are interpreted as a measure of impact to a  
222 site within a given year.

223 Finally, to get a sense of the community-level impact, two measures of community  
224 variability, the relative dispersion and the Index of Multivariate Dispersion (IMD), were  
225 computed by the MVDISP routine in Primer v 7.0.13 (Clarke and Gorley 2015). Relative  
226 dispersion was computed as the average for each station within a year. Ranging from 0 to 2,

227 lower values generally indicate lower stress (Warwick and Clarke, 1995). IMD produces a  
228 singular value that reflects the contrast of the rank of Bray-Curtis similarities in one group  
229 against the ranked similarities of another. A value of +1 signifies all similarities among samples  
230 of a group are higher than any among the contrasting group. A value of 0 and -1 infers little to no  
231 difference between groups (Warwick and Clarke, 1995). For either dispersion metric, individual  
232 sample values cannot be computed thus statistical testing cannot be applied, and inferences are  
233 instead made by empirical contrasts.

234 Tests of oil-impact based on macrofauna (feeding guild abundance, BPA, and DwH  
235 macrofauna indicators) were tested in a two-way PERMANOVA with site and time as fixed  
236 factors. This was followed by pairwise comparisons to identify differences between time points  
237 and between sites within time points. Significance was determined by Monte Carlo simulation  
238 when low permutations ( $< 100$ ) occurred. In order to run PERMANOVA tests of abundance,  
239 BPA, and DwH indicators, values from these metrics were root-transformed and Bray-Curtis  
240 similarities were calculated. Pairwise Euclidean similarities were calculated for untransformed  
241 species richness and Pielou's evenness for the PERMANOVA. Choice of similarity index was  
242 made as prescribed by Anderson et al. (2008).

243 To lower the risk of a type I error for inter-site pairwise comparisons, a Bonferroni  
244 correction of  $\alpha/k$  where  $k$  represents the number of comparisons was applied (see Cabin and  
245 Mitchell (2000)), thus based on a critical  $\alpha$  of  $< 0.05$ , significance was detected if  $\alpha$  fell below  
246 0.005 for 2012 and 2013, and 0.0024 for 2014 for pairwise comparisons. All abundance and  
247 diversity metrics were computed and PERMANOVA tests were conducted in PRIMER v 7.0.13  
248 (Clarke and Gorley 2015). Plots of univariate metrics were made in R 3.5.3 (R Core Team 2019).  
249

### 250 III. Results

#### 251 *3.1 Analysis of abundance, community and feeding guild composition and analysis of structure*

252  
253 A total of 2455 macrofaunal individuals across 119 families and higher taxa were  
254 identified and counted. Macrofaunal proportional abundances remained relatively stable through  
255 time for each of the sites in the canyon and on the adjacent slope (Table 2). Polychaetes  
256 dominated in each community through time, with 51 – 66% of the community composition, and  
257 the highest proportions at XC3 and XC4. Tanaids were the next most abundant, with 5.3 –  
258 15.35% of the total abundance. Tanaids had rather high proportions for NT800 in both years, and  
259 at S36 and XC4 in 2012. Aplacophorans exhibited high abundances at XC2 in both years and  
260 bivalves exhibited high abundances in both years at XC3. In the three-year sites, amphipods and  
261 the non-tanaid crustaceans generally exhibited slight increases through time. Tanaids dropped by  
262 almost 8.5% at the deepest site of XC4 between 2012 and 2013. Bivalves, aplacophorans, and  
263 other molluscs displayed more disparate patterns with sporadic increases and decreases through  
264 time with no group showing large changes. All crustacean and molluscan groups exhibited  
265 somewhat marginal decreases in proportions in 2014 compared to 2012 in XC2. Similar trends  
266 were observed at XC3 though tanaids and bivalves increased. Polychaetes increased almost 10%  
267 in 2014 versus 2012 for XC2 but annelids otherwise did not change between years for other sites.

268 PERMANOVA showed time point was not significant overall for within site abundance,  
269 species richness, or evenness (Figure 2). However, abundance was higher in 2012 for PCB06 (vs  
270 2013,  $t = 3.4619$ ,  $p = 0.032$ ; vs 2014,  $t = 3.0148$ ,  $p = 0.04$ ) and S36 (vs 2013,  $t = 3.5856$ ,  $p =$   
271  $0.019$ ; vs 2014,  $t = 2.9593$ ,  $p = 0.038$ ) (Fig 2A). Mean species richness showed no significant  
272 pairwise yearly change at any sites (Fig 2B). Average evenness for XC4 and PCB06 showed a

273 general increase across years, while XC2 stayed about level and S42 and NT800 decreased (Fig  
274 2C).

275 Table 3 summarizes the feeding guild composition of the DeSoto Canyon macrofauna in  
276 2012-2014. Deposit feeders dominated through time and across sites, representing 60% or more  
277 of all individuals, with XC4 having higher proportional abundances than any other site.  
278 Omnivores and carnivores followed in dominance and varied across stations but maintained  
279 relatively similar proportions through time. Suspension feeders and chemosymbiotic species  
280 were the least abundant, holding proportions of 9% or less across time and stations. XC3 had  
281 chemosymbiotic taxa rise almost 7% between 2012 and 2014. No consistent changes in feeding  
282 guild proportions were observed across sites except for carnivores who consistently increased  
283 through time for all canyon stations. No drastic difference in proportions were observed between  
284 slope and canyon stations.

285 Cluster analysis of macrofaunal community structure showed samples clustered mostly  
286 by depth and by station and somewhat by year within station (Fig 3A). Samples from XC4, the  
287 deepest station at 2200 m, branched off as the most disparate cluster. Open slope stations S42  
288 and NT800 grouped together in another single, separate cluster with a high degree of overlap in  
289 structure between the sites, regardless of time point. Among the remaining samples, two of the  
290 XC3 samples from 2012 cluster outside any other group. All time points for S36 form a cluster,  
291 and all time points from PCB06 and XC2 cluster together with the remaining XC3 samples. A  
292 NMDS of community structure (Fig 3B) largely reflected groups delineated by the cluster  
293 analysis. Tests of community structure mainly indicated a significant difference by station ( $p <$   
294 **0.001**, Table 4) rather than by time point ( $p = 0.17$ , Table 4). The interaction of time point and  
295 station also produced a low p-value ( $p = \mathbf{0.004}$ , Table 4). Despite these results, the trajectory

296 plots of community structure for each station suggests some interannual variability in community  
297 structure at each site (Fig 3C). Two-year time-series sites, XC2 and XC3, showed relatively little  
298 change between 2012 and 2014. All three-year sites, PCB06, S36, and XC4, seemed to  
299 experience a larger change in structure going from 2012 to 2013, compared to 2013 to 2014.

300 Feeding guild structure cluster analysis showed a higher percent similarity among  
301 samples but did not group as distinctly by station as the data based on family identification, or by  
302 time point, but some depth-based clustering was observed (Fig 4A). XC4 again formed its own  
303 cluster. All other stations formed a second, larger cluster that split into 2 groups, one containing  
304 2012 and 2014 samples from PCB06, XC2 and three of the XC3 samples, the other with the  
305 remaining stations and time points. Feeding guild structure depicted by NMDS, affirmed the  
306 cluster analysis (Fig 4B). Community structure did not show a strong grouping by time point ( $p$   
307 = 0.729, Table 4) nor by the interaction ( $p$  = 0.208, Table 4). Trajectories of structure across time  
308 illustrate stronger changes from the beginning of time-series (compared to the same graph based  
309 on families Fig 3B) for all stations except S42 (Fig 4C) that suggest modest interannual  
310 variability. Three-year time-series sites in the canyon suggest less differentiation between 2013  
311 and 2014 (which are also the only years S42 was sampled) than compared to the differentiation  
312 of either year to the 2012 time point.

313

### 314 *3.2 Tests of Deepwater Horizon indicators*

315 The various indicators employed to gauge the impact of the Deepwater Horizon indicated  
316 minimal differences through time. The BPA index exhibited a high variance in 2012 across  
317 almost all sites sampled in that year (Fig 5). S36 show a gradual decline from 2012 - 2014 while  
318 XC2, NT800 and S42 seemed to show a slight increase. Due to the absence of amphipods in two

319 of the three replicates for XC3 in 2014, the BPA could not be computed thus the whole station  
320 was excluded from analysis. Though the BPA could not be computed for XC3 in 2014,  
321 polychaete abundance for that year is plotted to contrast the BPA computed in 2012 and shows  
322 the high number of polychaetes in that year. Through time, average BPA ratios for open slope  
323 stations in 2013 (10.46 – 15.16) were generally lower than canyon stations in the same year  
324 (19.88 – 37.83) while 2014 open slope (15.00 – 15.89) and canyon (12.33 – 17.48) values were  
325 more equivalent except for XC3 where only polychaetes were recorded at 122 individuals and  
326 for XC4 with a mean BPA of 26.06. Time point was not significant for the comparison of BPA  
327 but site ( $p < 0.001$ , Table 5) and the interaction of site and time point were ( $p = 0.021$ , Table 5).  
328 The only pairwise comparisons where effects were observed were in 2013 when average BPA  
329 for S36 (20.6) ( $p = 0.016$ , Table 5) and XC4 (37.8) ( $p = 0.013$ , Table 5) were greater than S42  
330 (10.16).

331 Among feeding guild abundances, two-way PERMANOVA did not indicate differences  
332 for time points but did among stations for most feeding guilds (Pseudo- $F_{6,49} = 8.4258 - 25.322$ ,  
333  $p < 0.05$ , Table A1) except for suspension feeders (Pseudo- $F_{2,49} = 1.4517$ ,  $p = 0.15$ ) (Table A1).  
334 The interaction term was only significant for chemosymbiotic species (Pseudo- $F_{8,49} = 2.3414$ ,  $p$   
335  $= 0.03$ ). A couple of pairwise site comparisons for chemosymbiotic feeders resulted in negative  
336 test statistics (Table A1), an artifact of PERMANOVA whose meaning remains elusive  
337 (Anderson et al., 2008), and thus were not interpreted. Time point pairwise tests only resulted in  
338 differences for deposit feeders at only PCB06, with larger abundances in 2012 (vs 2013,  $t =$   
339  $2.7542$ ,  $p = 0.039$ ; vs 2014,  $t = 3.4156$ ,  $p = 0.022$ ) (Fig 6B) and chemosymbiotic taxa showed a  
340 significantly higher abundance at XC3 in 2014 versus 2012 ( $t = 2.7919$ ,  $p = 0.014$ ) (Fig 6E).

341 XC2 had higher proportional abundances of carnivores in 2014, but the difference was not  
342 significant ( $t = 2.5478$ ,  $p = 0.074$ ).

343 Site-to-site carnivores in 2012, XC4 (mean 6.7 ind) were significantly less abundant than  
344 PCB06 (mean 29.7 ind,  $p = 0.004$ ), XC2 (30.3 mean ind,  $p = 0.001$ ) and S36 (mean 18.7 ind,  $p =$   
345  $0.004$ ). No differences were observed in 2013 but by 2014, the average number of carnivores at  
346 S42 (16.7 ind) was lower than PCB06 (32.3 ind,  $p = 0.001$ ) and XC2 (46 ind,  $p = 0.001$ ), while  
347 XC2 was greater than XC3 (20 ind,  $p = 0.002$ ). Deposit feeders were more abundant at PCB06  
348 than S36 (average 154.7 ind against 104 ind,  $p = 0.003$ ) in 2012. In 2013 at S42 (80.7 mean ind)  
349 and NT800 (85.5 mean ind) ( $p = 0.002$ ) deposit feeders were greater than XC4 (48 mean ind,  $p =$   
350  $0.001$ ). XC4 was less abundant in deposit feeders than S36 (76.7 mean ind,  $p = 0.003$ ) in 2013.  
351 Non-canyon stations in 2013, S42 (80.7 ind) and NT800 (85.5) also showed higher abundance  
352 than XC4 (48 ind) ( $p = 0.001$  and  $0.002$  respectively). Average abundance for deposit feeders in  
353 2014 for S42 (76.7 ind) was less than XC2 (159 ind) ( $p = 0.002$ ). No inter-site comparisons were  
354 significant for omnivores and suspension feeders. Chemosymbiotic feeders were only significant  
355 in 2014 where XC3 (mean 18.7 ind) was higher than S36 (mean 1.3 ind) and XC4 (mean 1.3 ind)  
356 ( $p=0.002$  respectively). Test results of site pairwise comparisons are summarized in Table A2 of  
357 the supplementary materials.

358 DwH macrofaunal indicator species proportions occupied a large range of values across  
359 time points. Cosmopolitan taxa (Fig 7A) generally held high proportions, averaging about 18.5 –  
360 35% across all sites. Tolerant taxa (Fig 7B) exhibited average proportions of 10 – 16% for non-  
361 canyon stations and 16 – 40% for sites within the canyon. Possibly tolerant taxa (Fig 7C) held  
362 low proportions, 0 – 5.4%, across all sites. Possibly sensitive proportions averaged 4.4 to 18.7%  
363 (Fig 9D) and sensitive groups averaged 17.6 – 47.5% in proportion (Fig 7E). Two-way



364 PERMANOVA indicated a significant difference among sites (Pseudo- $F_{8,49} = 5.1431 - 23.471$ , **p**  
365 **< 0.05**, Table A2), but not among time points (Table A2). The interaction term was only  
366 significant for sensitive taxa (Pseudo- $F_{8,49} = 2.2515$ , **p = 0.027**, Table A2). Pairwise tests,  
367 however, yielded differences where global tests did not find them. XC2 and XC3 demonstrated  
368 some of the sharpest differences between years. Possibly tolerant groups were observed to be  
369 more abundant in 2014 compared to 2012 at XC2 ( $t = 3.5601$ , **p = 0.024**) and fewer in XC3 ( $t =$   
370  $3.0391$ , **p = 0.045**) for the same time period. Further, S36 exhibited greater possibly sensitive  
371 group proportions in 2012 compared to 2013 ( $t = 3.4796$ , **p = 0.032**) but not versus 2014.

372 Site-by-site test results are summarized in Table A2. By site, cosmopolitan taxa  
373 constituted larger proportions for XC2 (mean 35.2%) than XC3 (mean 21.8%) (**p = 0.002**) in  
374 2012. In 2013, cosmopolitan taxa proportions were higher in S42 (32.6%) than NT800 (24.0%)  
375 (**p = 0.004**). S42 was also higher than XC4 (average 18.5%) (**p = 0.001**). No differences were  
376 observed by 2014. Tolerant taxa proportions were only higher for XC3 (mean 37.5%) compared  
377 to S36 (24.9%) (**p = 0.001**) in 2012. In 2013 average tolerant taxa proportions at XC4 (26.4%)  
378 were lower than non-canyon stations S42 (0.5%) (**p = 0.004**) and NT800 (9.8%) (**p = 0.003**), and  
379 by 2014 no differences were observed. Average proportions of possibly tolerant taxa were only  
380 different in 2012 where XC3 (3.5%) was greater than XC4 (1.3%) (**p = 0.003**), and 2014 where  
381 XC2 (5.4%) was greater than XC4 (0.0%) (**p = 0.001**). No pairwise differences were observed  
382 between sites for possibly sensitive taxa. Sensitive taxa community proportions in 2012 were  
383 higher at S36 (40.2%) and XC4 (47.5%) (**p = 0.001**) compared to XC3 (17.6%) (**p = 0.001**). No  
384 differences were observed in 2013, but by 2014 proportions of sensitive taxa were higher at  
385 NT800 (average 39.2%) (**p = 0.001**) and S36 (40.1%) (**p = 0.002**) than XC2 (21.0%).

386 Community dispersion ranged from 0.12 – 1.693 among stations and years (Table 6).  
387 Non-canyon slope sites had dispersion values ranging from 0.87-1.24. PCB06 and XC2 had  
388 some of the lowest values of any station, ranging from 0.12 – 0.733, indicating generally low  
389 community stress. XC3 exhibited a decrease with a dispersion value of 1.28 in 2012 and 0.413 in  
390 2014. S36 had relatively high values (1.24 – 1.52), but XC4 exhibited the highest dispersion,  
391 ranging from 1.693 to 1.8.

392 Pairwise IMD for the 2012 inter-site comparisons generally indicated that dispersion was  
393 only different for S36 compared to XC2 and XC3 vs XC4 (Table 6). In 2013, S36 and XC4  
394 showed some slight differentiation in dispersion and stronger differentiation compared to non-  
395 canyon stations S42 and NT800 and to each other. By 2014, XC2 and XC3 had moderate to high  
396 dispersion differences with every other stations. S36 also had differences compared to S42 and  
397 XC4, and XC4 was also different from both non-canyon stations.

398

#### 399 **IV. Discussion**

##### 400 *4.1 Temporal variability in DeSoto Canyon macrofauna and the adjacent slope*

401 In this examination of temporal variability of Desoto Canyon macrofauna from 2012 –  
402 2014, most community parameters showed no significant difference through time at a given  
403 station including total macrofaunal abundance, species richness, evenness, and abundance of  
404 most feeding guilds. Only a few parameters showed statistically significant changes at one or a  
405 few specific sites these include a decrease in abundance of total macrofauna at PCB06 and S36,  
406 and an increase in the abundance of deposit feeders decreased at PCB06, and in the abundance of  
407 chemosymbiotic species at XC3 between 2012 and 2014. Community structure, though not  
408 statistically significant, did shift over time within each station though, indicating some temporal

409 variability in community structure, with a consistently larger change within each site from 2012  
410 to 2013 than there was from 2013 to 2014. These somewhat low levels of change suggest that  
411 DeSoto Canyon communities were largely stable over the 3-year time period.

412 The lack of pronounced interannual variability in abundance at most stations is consistent  
413 with studies of non-canyon central NGOM polychaete assemblages spanning the continental  
414 shelf to the slope, from 1983 – 1984, in which Qu et al. (2017) and Reuscher and Shirley (2017)  
415 found relatively minor interannual variability in abundance, present in only a subset of the total  
416 sites investigated and often with the peak attributed to seasonal changes.

417 These results are inconsistent however, with other studies across the broader NGOM, that  
418 indicated temporal changes in abundance. For example, Pequegnat et al (1990) were the first to  
419 publish data to suggest interannual patterns in abundance among western, central, and eastern  
420 regions of the NGOM. From a later broad survey of the NGOM, Montagna et al. (2020) showed  
421 a significant 36% decrease in macrofaunal abundance from 2000 to 2001. Additionally,  
422 northwestern GOM macrofauna in a timespan close to the present study, 2010 – 2012, increased  
423 in abundance (Salcedo et al., 2017).

424 Inter-year investigations of diversity were not part of the focus of previous studies  
425 examining NGOM benthic temporal variability but community structure has been. Central  
426 NGOM continental slope polychaete assemblages showed large trajectory change in NMDS  
427 plots in 1983-1984, but when statistically tested, differences were minor, especially for sites  
428 deeper than 845 – 2540 m (Reuscher and Shirley, 2017). This is in keeping with the present  
429 study as the sites sampled in the DeSoto Canyon exhibited trajectories indicative of change and  
430 fall into the same depth range.

431           The short time period of the current study may have missed more gradual longer-term  
432 changes that can occur in benthic communities. Studies across decadal time scales may be  
433 needed to capture these patterns, but may also reveal long term stability in diversity in benthic  
434 macrofauna. For example Qu et al. (2017) and Reuscher and Shirley (2017) found polychaete  
435 assemblages variability between 1983 and 1984 though high, was not outside the range of  
436 variation from 2000 – 2001 at the same sites. Similarly Qu et al. (2017) observed diversity was  
437 similar for polychaetes between 1983 – 1985 and 2000 – 2002 on the western and central NGOM  
438 slope. Wei and Rowe (2019) observed the same diversity pattern for NGOM macrofauna as a  
439 whole across the same time period. Variability in community structure has less straightforward  
440 patterns in the long term. Distinct decadal separation in community structure was observed for  
441 upper continental slope polychaete assemblages (Qu et al., 2017) but not assemblages on the  
442 lower slope (Reuscher and Shirley, 2017).

443           Another possibility for long-term patterns is that there may be minimal long-term  
444 trajectories in communities that are punctuated by abrupt change brought on by stochastic events.  
445 In longer term time-series, polychaete assemblages in the northeast Atlantic, for example,  
446 displayed little change in density in the 5-6 years before the ‘*Amperima*’ event, wherein a  
447 suspected food pulse caused a rise in opportunistic cirratulids, spionids, and opheliids and also  
448 generated augmented numbers of deposit feeders and predators during and in the 2-3 years  
449 afterwards (Soto et al. 2010). In two long-term time-series of northern Pacific (1991 – 2005) and  
450 Atlantic (1991 – 1999) polychaetes, the greatest change in rank abundance of family and  
451 functional group did not occur until 1998, seven years after monitoring had started (Laguionie-  
452 Marchais et al. 2013). Temporal changes in community structure were also observed in that  
453 study as the 1998 time point tended to form a singular cluster, indicating some perturbation that

454 year but no explanatory environmental factor could be identified (Laguionie-Marchais et al.  
455 2013). Thus, greater temporal variability within the DeSoto Canyon cannot be ruled out as  
456 further research on DeSoto Canyon macrobenthic temporal dynamics over longer time scales  
457 may reveal patterns that are not apparent in a three-year temporal study.

458

#### 459 *4.2 Is there any evidence of the influence of the DwH oil spill on DeSoto Canyon macrofauna?*

460

461 Patterns of macrobenthic oil spill response and recovery have primarily been investigated  
462 in shallow, coastal environments where recovery is a product of time and distance from the  
463 contamination source. After inundation by hydrocarbons, direct mortality can be observed, then  
464 rapid recolonization (months to a year) of opportunistic taxa occurs followed by a stabilization in  
465 abundance and richness (Berge 1990; Lu and Wu 2006). For macrofauna, this means initial  
466 increases in abundance driven by a dominance of deposit feeders, like polychaetes, and a drop in  
467 sensitive taxa such as crustaceans (especially amphipods) and molluscs (for an review of effects,  
468 see Suchanek (1993) and Peterson et al. (1996)). Large shifts in community composition would  
469 then result in a detectable alteration in community structure. Offshore GOM oil production  
470 impact assessments and reviews have generally corroborated the same effect, concluding  
471 continued industrial processes foster higher community dispersion, augmented abundances of  
472 deposit feeding polychaetes (driven by increased organic loading or resource availability), and  
473 are detrimental to sensitive crustaceans such as ostracods and amphipods (Montagna and Harper  
474 1996; Peterson et al. 1996; Hernández-Arana et al. 2005). In terms of specific metrics of oil  
475 impact, more impacted sites and time points would be expected to have higher BPA ratios and  
476 higher dispersion (Andrade and Renaud, 2011). Among the DwH macrofaunal indicators, a

477 greater proportion of tolerant and possibly tolerant groups along with lower relative abundances  
478 of sensitive and possibly sensitive taxa would be expected at impacted sites.

479 Schwing and Castillo (2020) posited oil spill recovery takes 3 – 5 years for GOM  
480 infauna based on evidence from foraminiferan abundance and recovery rates from the Ixtoc I oil  
481 spill in 1979 and the DwH. Sampling for the current study began two years after the initial spill,  
482 thus based on the patterns outlined above, if oil reached the canyon, sampling likely missed the  
483 initial phases of disturbance and the very start of the recovery process. It might be predicted that  
484 any impacted sites would then be in the phase of decline and stabilization in abundance,  
485 increasing diversity, and altered community structure through time. Year-to-year, only PCB06  
486 and S36 exhibited any evidence of the expected impact patterns, showing peaks in abundance in  
487 2012 decreasing into 2014. This lack of evidence in community patterns at most sites matches  
488 the lack of evidence for spill influence based on the oil spill metrics. Functional group abundance  
489 was only elevated for PCB06 in 2012 for deposit feeders and for chemosymbiotic taxa at XC3 in  
490 2014. The increase in chemosymbiotic taxa was driven by an increase in thyasirid bivalves  
491 which are tolerant to DwH contamination (Washburn et al., 2016), and may suggest an increased  
492 influence at this site in 2014 compared to 2012. Deposit feeders increased at XC3 in 2014 also,  
493 which could support this inference, however the increase was not significant. There was a  
494 significant decrease in potentially tolerant species at XC3 in the same time period though, which  
495 contradicts the potential for increased oil influence at this site through time. Also, the increase in  
496 thyasirids at XC3 did not correspond with an increase in tolerant taxa at the same site over the  
497 study period, but XC3 had a higher proportion of tolerant taxa than any other site. For other  
498 stations, DwH indicator taxa proportions largely did not change through time except for a  
499 significant increase in potentially tolerant groups at XC2. Community dispersion was

500 consistently high for XC4, but most other sites had dispersion comparable to or lower than non-  
501 canyon control stations.

502 Site-to-site, the number of differences found between macrofaunal communities among  
503 the oil-influence metrics were not high. Often, when differences were found, they were not  
504 detected by the final year of the sampling program. Sites with confirmed hydrocarbon  
505 deposition, PCB06, XC2, XC3, and XC4, most frequently exhibited greater potential indicators  
506 of impact compared to other canyon sites or adjacent slope sites. XC3 contained the most  
507 evidence for impact, but the evidence was stronger in 2014 rather than 2012. Chemosymbiotic  
508 feeders there in 2014 had elevated numbers compared to all other canyon stations and time  
509 points and, among the DwH macrofaunal indicators, contained greater proportions of tolerant  
510 and possibly tolerant taxa and low amounts of sensitive taxa compared to other canyon sites,  
511 especially in 2012. XC2 is the only other site to show low levels of sensitive taxa in both  
512 sampling years. XC4 showed the highest levels of dispersion (i.e., community stress) in all years.  
513 Finally, disparities among community dispersion were most frequent for XC2 and XC3 and  
514 persisted until the final year of sampling.

515 Taken together these metrics of oil influence indicate that the evidence for impacts to any  
516 of the stations was neither consistent among indicators nor overwhelming on a year-to-year or  
517 site-to-site basis. If any stations were still being affected by 2014, stations XC2, XC3, and XC4  
518 had the greatest potential effect followed by PCB06. The depths of PCB06, XC2, and XC3, are  
519 consistent with the hydrocarbon plume depths (~1000 and 1400 m) reported by Hollander et al.  
520 (2012). The increased effects at XC3 in 2014 (plus high dispersion in 2012) plus the high  
521 dispersion at XC4 could potentially be explained by the turbidity-based downslope transport of  
522 hydrocarbons that Romero et al. (2020) proposed.

523 Severe infaunal impact first documented in close proximity and through time for the  
524 DwH (Qu et al. 2015; Montagna et al. 2016; Reuscher et al. 2017; Washburn et al. 2017)  
525 indicates the distance, low level of deposition, and time of sampling likely mitigated the overall  
526 effect observed for the DeSoto Canyon. Indeed, DeSoto Canyon stations are in the areas of the  
527 least petrocarbon deposition (Fig 1). Canyon sites are also located in regions of low impact  
528 according to predicted infaunal impact maps devised by Montagna et al (2013) and Reuscher et  
529 al. (2020) (Fig A1A and B). Chemical evidence would also suggest that impact to DeSoto  
530 Canyon macrofauna would not have been severe. For at least three of the sites in our target study  
531 area, XC2, PCB06, and XC3; total PAHs were elevated in 2010 (up to 524 ng g<sup>-1</sup>, 329 ng g<sup>-1</sup>,  
532 and 190 ng g<sup>-1</sup> respectively) and 2011 (up to 99 ng g<sup>-1</sup>, 171 ng g<sup>-1</sup>, 373 ng g<sup>-1</sup>, respectively)  
533 following the DwH (Romero et al. 2015). Deposition levels were not measured or reported for  
534 XC4, but relatively heavy deposition can be inferred from the radiocarbon data presented in  
535 Figure 1B. These levels are generally greater than previous surveys of the canyon where  
536 background PAHs were observed to be 114 ± 47 ng g<sup>-1</sup> (Rowe and Kennicutt 2009) but lower  
537 than the typical range of urbanized and industrialized coastal regions worldwide which span  
538 ~1200 – 11000 ng g<sup>-1</sup> (Qiao et al. 2006; El Nemr et al. 2013). Further, concentrations reported by  
539 Romero et al. (2015) are also considered low to moderate pollution levels based on the proposed  
540 range of potential impact for aliphatics (10 – 100 µg g<sup>-1</sup>) and PAHs (100 – 1100 ng g<sup>-1</sup>)  
541 (Baumard et al. 1998; Commendatore et al. 2012). Observed PAH levels at these sites also fall  
542 below the “low limit” of PAH concentrations thought to be biologically toxic in shallow  
543 sediments (4402 ng g<sup>-1</sup>) (Long et al. 1995). Further, in an effort to establish sediment quality  
544 benchmarks for evaluating risks of oil-related impact to the deep-sea benthos from the DwH,  
545 Balthis et al. (2017) derived a low probability of impact to macrofauna (< 20%) when total PAH



546 concentrations were lower than 4000 ng g<sup>-1</sup> (ppm) and high (> 80%) when greater than 24000 ng  
547 g<sup>-1</sup>. Thus, it can be concluded the level of hydrocarbon influx into the DeSoto Canyon would not  
548 have severely impacted resident biota and this conclusion is largely corroborated by the scant  
549 effects observed in the macrofauna communities of the present study.

550

#### 551 **IV. Conclusions**

552 DeSoto Canyon macrofauna exhibited limited amounts of temporal change in abundance,  
553 diversity, and community structure through the study period. Similarly, attempts to relate  
554 observed trends to the DwH using established faunal oil-impact and disturbance metrics  
555 indicated little to no evidence of impact. Sites with confirmed hydrocarbon deposition, XC2,  
556 XC3, and XC4, had minor evidence of potential impacts, but results were not consistent across  
557 metrics or years. The lack of temporal change and response to the DwH is likely a product of  
558 distance from the wellhead (~40 – 185 km east/southeast), time of sampling, and the general low  
559 deposition of DWH hydrocarbons within the canyon.

560

561

562

563

## Bibliography

- 564  
565  
566 Anderson, M., Gorley, R.N., Clarke, K., 2008. PERMANOVA+ for primer: Guide to software and statistical  
567 methods.
- 568 Andrade, H., Renaud, P.E., 2011. Polychaete/amphipod ratio as an indicator of environmental impact  
569 related to offshore oil and gas production along the Norwegian continental shelf. *Marine Pollution*  
570 *Bulletin* 62, 2836-2844.
- 571 Antoine, J., Bryant, W., 1968. The Major Transition Zones of the Gulf of Mexico: Desoto and Campeche  
572 Canyons.
- 573 Baguley, J., Montagna, P., Cooksey, C., Hyland, J., Bang, H., Morrison, C., Kamikawa, A., Bennetts, P.,  
574 Saiyo, G., Parsons, E., Herdener, M., Ricci, M., 2015. Community response of deep-sea soft-sediment  
575 metazoan meiofauna to the Deepwater Horizon blowout and oil spill. *Marine Ecology Progress*  
576 *Series* 528, 127-140.
- 577 Baguley, J.G., Montagna, P.A., Lee, W., Hyde, L.J., Rowe, G.T., 2006. Spatial and bathymetric trends in  
578 Harpacticoida (Copepoda) community structure in the Northern Gulf of Mexico deep-sea. *Journal of*  
579 *experimental marine biology and ecology* 330, 327-341.
- 580 Balthis, W.L., Hyland, J.L., Cooksey, C., Montagna, P.A., Baguley, J.G., Ricker, R.W., Lewis, C., 2017.  
581 Sediment quality benchmarks for assessing oil-related impacts to the deep-sea benthos. *Integrated*  
582 *Environmental Assessment and Management* 13, 840-851.
- 583 Baumard, P., Budzinski, H., Garrigues, P., Sorbe, J., Burgeot, T., Bellocq, J., 1998. Concentrations of PAHs  
584 (polycyclic aromatic hydrocarbons) in various marine organisms in relation to those in sediments  
585 and to trophic level. *Marine Pollution Bulletin* 36, 951-960.
- 586 Belabbassi, L., Chapman, P., Nowlin Jr, W.D., Jochens, A.E., Biggs, D.C., 2005. Summertime nutrient  
587 supply to near-surface waters of the northeastern Gulf of Mexico: 1998, 1999, and 2000. *Gulf of*  
588 *Mexico Science* 23, 1.
- 589 Berge, J.A., 1990. Macrofauna recolonization of subtidal sediments. Experimental studies on defaunated  
590 sediment contaminated with crude oil in two Norwegian fjords with unequal eutrophication status.  
591 I. Community responses. *Marine ecology progress series*. Oldendorf 66, 103-115.
- 592 Bernardino, A.F., Smith, C.R., Baco, A., Altamira, I., Sumida, P.Y.G., 2010. Macrofaunal succession in  
593 sediments around kelp and wood falls in the deep NE Pacific and community overlap with other  
594 reducing habitats. *Deep Sea Research Part I: Oceanographic Research Papers* 57, 708-723.
- 595 Biggs, D.C., Hu, C., Müller-Karger, F.E., 2008. Remotely sensed sea-surface chlorophyll and POC flux at  
596 Deep Gulf of Mexico Benthos sampling stations. *Deep Sea Research Part II: Topical Studies in*  
597 *Oceanography* 55, 2555-2562.
- 598 Brooks, G.R., Larson, R.A., Schwing, P.T., Romero, I., Moore, C., Reichart, G.-J., Jilbert, T., Chanton, J.P.,  
599 Hastings, D.W., Overholt, W.A., 2015. Sedimentation pulse in the NE Gulf of Mexico following the  
600 2010 DWH blowout. *PloS one* 10.
- 601 Cabin, R.J., Mitchell, R.J., 2000. To Bonferroni or not to Bonferroni: when and how are the questions.  
602 *Bulletin of the Ecological Society of America* 81, 246-248.
- 603 Clarke, K., Gorley, R., 2015. PRIMER v7: User Manual/Tutorial; PRIMER-E: Plymouth, UK, 2015. PRIMER-  
604 E, Plymouth, UK.
- 605 Commendatore, M.G., Nievas, M.L., Amin, O., Esteves, J.L., 2012. Sources and distribution of aliphatic  
606 and polyaromatic hydrocarbons in coastal sediments from the Ushuaia Bay (Tierra del Fuego,  
607 Patagonia, Argentina). *Marine Environmental Research* 74, 20-31.
- 608 Demopoulos, A.W.J., Bourque, J.R., Frometa, J., 2014. Biodiversity and community composition of  
609 sediment macrofauna associated with deep-sea *Lophelia pertusa* habitats in the Gulf of Mexico.  
610 *Deep Sea Research Part I: Oceanographic Research Papers* 93, 91-103.

- 611 Doyle, L.J., Sparks, T.N., 1980. Sediments of the Mississippi, Alabama, and Florida (MAFLA) continental  
612 shelf. *Journal of Sedimentary Research* 50.
- 613 El Nemr, A., El-Sadaawy, M.M., Khaled, A., Draz, S.O., 2013. Aliphatic and polycyclic aromatic  
614 hydrocarbons in the surface sediments of the Mediterranean: assessment and source recognition of  
615 petroleum hydrocarbons. *Environmental Monitoring and Assessment* 185, 4571-4589.
- 616 Emiliani, C., Gartner, S., Lidz, B., Eldridge, K., Elvey, D.K., Huang, T.C., Stipp, J.J., Swanson, M.F., 1975.  
617 Paleoclimatological analysis of late Quaternary cores from the northeastern Gulf of Mexico. *Science*  
618 189, 1083-1088.
- 619 Glover, A., Gooday, A., Bailey, D., Billett, D., Chevaldonné, P., Colaco, A., Copley, J., Cuvelier, D.,  
620 Desbruyeres, D., Kalogeropoulou, V., 2010. Temporal change in deep-sea benthic ecosystems: a  
621 review of the evidence from recent time-series studies. *Advances In Marine Biology*, Vol 58 58, 1-95.
- 622 Glover, A.G., Smith, C.R., 2003. The deep-sea floor ecosystem: current status and prospects of  
623 anthropogenic change by the year 2025. *Environmental Conservation* 30, 219-241.
- 624 Gomez Gesteira, J., Dauvin, J., Salvande Fraga, M., 2003. Taxonomic level for assessing oil spill effects on  
625 soft-bottom sublittoral benthic communities. *Marine Pollution Bulletin* 46, 562-572.
- 626 Gould, H.R., Stewart, R.H., 1955. Continental terrace sediments in the northeastern Gulf of Mexico.  
627 Special Publications of SEPM Finding Ancient Shorelines, 2-20.
- 628 Hastings, D.W., Bartlett, T., Brooks, G.R., Larson, R.A., Quinn, K.A., Rationale, D., Schwing, P.T., Bernal,  
629 L.H.P., Ruiz-Fernández, A.C., Sánchez-Cabeza, J.-A., 2020. Changes in Redox Conditions of Surface  
630 Sediments Following the Deepwater Horizon and Ixtoc 1 Events, *Deep Oil Spills*. Springer, pp. 269-  
631 284.
- 632 Hastings, D.W., Schwing, P.T., Brooks, G.R., Larson, R.A., Morford, J.L., Roeder, T., Quinn, K.A., Bartlett,  
633 T., Romero, I.C., Hollander, D.J., 2015. Changes in sediment redox conditions following the BP DWH  
634 blowout event. *Deep Sea Research Part II: Topical Studies in Oceanography*.
- 635 Hernández-Arana, H.A., Warwick, R.M., Attrill, M.J., Rowden, A.A., Gold-Bouchot, G., 2005. Assessing the  
636 impact of oil-related activities on benthic macroinfauna assemblages of the Campeche shelf,  
637 southern Gulf of Mexico. *Marine Ecology Progress Series* 289, 89-107.
- 638 Hollander, D.J., Larson, R., Brooks, G., Romero, I., Zinzola, N., Means, Z., 2012. Deposition, distribution  
639 and fate of Macondo oil in the sediments of the northeastern Gulf of Mexico. 2012 Ocean Sciences  
640 Meeting.
- 641 Jochens, A.E., DiMarco, S.F., 2008. Physical oceanographic conditions in the deepwater Gulf of Mexico in  
642 summer 2000–2002. *Deep Sea Research Part II: Topical Studies in Oceanography* 55, 2541-2554.
- 643 Kukert, H., Smith, C.R., 1992. Disturbance, colonization and succession in a deep-sea sediment  
644 community: artificial-mound experiments. *Deep Sea Research Part A. Oceanographic Research*  
645 *Papers* 39, 1349-1371.
- 646 Laguionie-Marchais, C., Billett, D., Paterson, G., Ruhl, H., Soto, E., Smith Jr, K., Thatje, S., 2013. Inter-  
647 annual dynamics of abyssal polychaete communities in the North East Pacific and North East  
648 Atlantic—A family-level study. *Deep Sea Research Part I: Oceanographic Research Papers* 75, 175-  
649 186.
- 650 Larson, R.A., Brooks, G.R., Schwing, P.T., Holmes, C.W., Carter, S.R., Hollander, D.J., 2018. High-  
651 resolution investigation of event driven sedimentation: Northeastern Gulf of Mexico. *Anthropocene*  
652 24, 40-50.
- 653 Li, Y., Hu, C., Quigg, A., Gao, H., 2019. Potential influence of the Deepwater Horizon oil spill on  
654 phytoplankton primary productivity in the northern Gulf of Mexico. *Environmental Research Letters*  
655 14, 094018.
- 656 Liu, J., Bacosa, H.P., Liu, Z., 2017. Potential environmental factors affecting oil-degrading bacterial  
657 populations in deep and surface waters of the northern Gulf of Mexico. *Frontiers in Microbiology* 7,  
658 2131.

- 659 Lu, L., Wu, R.S.S., 2006. A field experimental study on recolonization and succession of macrobenthic  
660 infauna in defaunated sediment contaminated with petroleum hydrocarbons. *Estuarine, Coastal and*  
661 *Shelf Science* 68, 627-634.
- 662 Mason, O.U., Scott, N.M., Gonzalez, A., Robbins-Pianka, A., Bælum, J., Kimbrel, J., Bouskill, N.J., Prestat,  
663 E., Borglin, S., Joyner, D.C., 2014. Metagenomics reveals sediment microbial community response to  
664 Deepwater Horizon oil spill. *The ISME journal*.
- 665 Mengerink, K.J., Van Dover, C.L., Ardron, J., Baker, M., Escobar-Briones, E., Gjerde, K., Koslow, J.A.,  
666 Ramirez-Llodra, E., Lara-Lopez, A., Squires, D., 2014. A call for deep-ocean stewardship. *Science* 344,  
667 696-698.
- 668 Montagna, P., Baguley, J., Rowe, G., Wade, T., 2020. Linking Abiotic Variables with Macrofaunal and  
669 Meiofaunal Abundance and Community Structure Patterns on the Gulf of Mexico Continental Slope,  
670 pp. 109-131.
- 671 Montagna, P., Harper, J., Donald E, 1996. Benthic infaunal long-term response to offshore production  
672 platforms in the Gulf of Mexico. *Canadian journal of fisheries and aquatic sciences* 53, 2567-2588.
- 673 Montagna, P.A., Baguley, J.G., Cooksey, C., Hartwell, I., Hyde, L.J., Hyland, J.L., Kalke, R.D., Kracker, L.M.,  
674 Reuscher, M., Rhodes, A.C., 2013. Deep-Sea Benthic Footprint of the Deepwater Horizon Blowout.  
675 *PLoS one* 8, e70540.
- 676 Montagna, P.A., Baguley, J.G., Cooksey, C., Hyland, J.L., 2016. Persistent impacts to the deep soft-  
677 bottom benthos one year after the Deepwater Horizon event. *Integrated Environmental Assessment*  
678 *and Management*.
- 679 Morse, J.W., Beazley, M.J., 2008. Organic matter in deepwater sediments of the Northern Gulf of Mexico  
680 and its relationship to the distribution of benthic organisms. *Deep Sea Research Part II: Topical*  
681 *Studies in Oceanography* 55, 2563-2571.
- 682 Müller-Karger, F.E., Walsh, J.J., Evans, R.H., Meyers, M.B., 1991. On the seasonal phytoplankton  
683 concentration and sea surface temperature cycles of the Gulf of Mexico as determined by satellites.  
684 *Journal of Geophysical Research: Oceans* 96, 12645-12665.
- 685 Nürnberg, D., Ziegler, M., Karas, C., Tiedemann, R., Schmidt, M.W., 2008. Interacting Loop Current  
686 variability and Mississippi River discharge over the past 400 kyr. *Earth and Planetary Science Letters*  
687 272, 278-289.
- 688 Overholt, W.A., 2018. The response of marine benthic microbial populations to the Deepwater Horizon  
689 oil spill. Georgia Institute of Technology, Atlanta, GA.
- 690 Overholt, W.A., Schwing, P., Raz, K.M., Hastings, D., Hollander, D.J., Kostka, J.E., 2019. The core seafloor  
691 microbiome in the Gulf of Mexico is remarkably consistent and shows evidence of recovery from  
692 disturbance caused by major oil spills. *Environmental Microbiology* 21, 4316-4329.
- 693 Peterson, C.H., Kennicutt II, M.C., Green, R.H., Montagna, P., Harper, J., Donald E, Powell, E.N., Roscigno,  
694 P.F., 1996. Ecological consequences of environmental perturbations associated with offshore  
695 hydrocarbon production: a perspective on long-term exposures in the Gulf of Mexico. *Canadian*  
696 *journal of fisheries and aquatic sciences* 53, 2637-2654.
- 697 Qiao, M., Wang, C., Huang, S., Wang, D., Wang, Z., 2006. Composition, sources, and potential  
698 toxicological significance of PAHs in the surface sediments of the Meiliang Bay, Taihu Lake, China.  
699 *Environment International* 32, 28-33.
- 700 Qu, F., Wang, Y., Rowe, G.T., 2017. Temporal and spatial variations in the polychaete (Annelida)  
701 populations on the upper continental slope of the northern Gulf of Mexico. *Deep Sea Research Part*  
702 *I: Oceanographic Research Papers* 119, 91-99.
- 703 Ramalho, S.P., Adão, H., Kiriakoulakis, K., Wolff, G.A., Vanreusel, A., Ingels, J., 2014. Temporal and spatial  
704 variation in the Nazaré Canyon (Western Iberian margin): Inter-annual and canyon heterogeneity  
705 effects on meiofauna biomass and diversity. *Deep Sea Research Part I: Oceanographic Research*  
706 *Papers* 83, 102-114.

- 707 Ramirez-Llodra, E., Tyler, P.A., Baker, M.C., Bergstad, O.A., Clark, M.R., Escobar, E., Levin, L.A., Menot, L.,  
708 Rowden, A.A., Smith, C.R., 2011. Man and the last great wilderness: human impact on the deep sea.  
709 *PloS one* 6, e22588.
- 710 Reuscher, M.G., Baguley, J.G., Conrad-Forrest, N., Cooksey, C., Hyland, J.L., Lewis, C., Montagna, P.A.,  
711 Ricker, R.W., Rohal, M., Washburn, T., 2017. Temporal patterns of Deepwater Horizon impacts on  
712 the benthic infauna of the northern Gulf of Mexico continental slope. *PloS one* 12, e0179923.
- 713 Reuscher, M.G., Baguley, J.G., Montagna, P.A., 2020. The expanded footprint of the Deepwater Horizon  
714 oil spill in the Gulf of Mexico deep-sea benthos. *PLOS ONE* 15, e0235167.
- 715 Reuscher, M.G., Shirley, T.C., 2017. Spatial and temporal patterns of benthic polychaete communities on  
716 the northern Gulf of Mexico continental slope. *Hydrobiologia* 790, 233-245.
- 717 Rivas, D., Badan, A., Ochoa, J., 2005. The Ventilation of the Deep Gulf of Mexico. *Journal of Physical*  
718 *Oceanography* 35, 1763-1781.
- 719 Rogers, A.D., 2015. Environmental Change in the Deep Ocean. *Annual Review of Environment and*  
720 *Resources* 40, 1-38.
- 721 Salcedo, D.L., Soto, L.A., Estradas-Romero, A., Botello, A.V., 2016. Interannual variability of soft-bottom  
722 macrobenthic communities of the NW Gulf of Mexico in relationship to the Deepwater Horizon oil  
723 spill. *Marine Pollution Bulletin* 114, 987-994.
- 724 Salcedo, D.L., Soto, L.A., Estradas-Romero, A., Botello, A.V., 2017. Interannual variability of soft-bottom  
725 macrobenthic communities of the NW Gulf of Mexico in relationship to the Deepwater Horizon oil  
726 spill. *Marine Pollution Bulletin* 114, 987-994.
- 727 Schwing, P., O'malley, B., Romero, I., Martínez-Colón, M., Hastings, D., Glabach, M., Hladky, E., Greco, A.,  
728 Hollander, D., 2017. Characterizing the variability of benthic foraminifera in the northeastern Gulf of  
729 Mexico following the Deepwater Horizon event (2010–2012). *Environmental Science and Pollution*  
730 *Research* 24, 2754-2769.
- 731 Schwing, P.T., Machain-Castillo, M.L., 2020. Impact and Resilience of Benthic Foraminifera in the  
732 Aftermath of the Deepwater Horizon and Ixtoc 1 Oil Spills, *Deep Oil Spills*. Springer, pp. 374-387.
- 733 Schwing, P.T., O'Malley, B.J., Hollander, D.J., 2018. Resilience of benthic foraminifera in the Northern  
734 Gulf of Mexico following the Deepwater Horizon event (2011–2015). *Ecological Indicators* 84, 753-  
735 764.
- 736 Schwing, P.T., Romero, I., Flower, B.P., Brooks, G.R., Larson, R.A., Hollander, D.J., Reilly, L.M., 2013.  
737 Effects of the Deepwater Horizon Blowout on Benthic Foraminifera Abundance in the Northeastern  
738 Gulf of Mexico. *Deep Sea Research Part II: Topical Studies in Oceanography*.
- 739 Schwing, P.T., Romero, I.C., Brooks, G.R., Hastings, D.W., Larson, R.A., Hollander, D.J., 2015. A Decline in  
740 Benthic Foraminifera following the Deepwater Horizon Event in the Northeastern Gulf of Mexico.  
741 *PloS one* 10, e0120565.
- 742 Shantharam, A.K., Wei, C.-L., Silva, M., Baco, A.R., In revision. Macrofaunal diversity and community  
743 structure of the DeSoto Canyon and Adjacent Slope. *Marine Ecology Progress Series*.
- 744 Silva, M.G., 2017. Fate of the Mesophotic Coral Ecosystem (MCE) in the Northeastern Gulf of Mexico  
745 after the Deepwater Horizon Incident, Department of Earth, Ocean, and Atmospheric Science.  
746 Florida State University, Tallahassee, FL, p. 132.
- 747 Smith, C.R., 1986. Nekton falls, low-intensity disturbance and community structure of infaunal benthos  
748 in the deep sea. *Journal of Marine Research* 44, 567-600.
- 749 Smith, C.R., Baco, A.R., Glover, A.G., 2002. Faunal succession on replicate deep-sea whale falls: time  
750 scales and vent-seep affinities. *Cahiers de Biologie Marine* 43, 293-298.
- 751 Smith, K., Ruhl, H., Bett, B., Billett, D., Lampitt, R., Kaufmann, R., 2009. Climate, carbon cycling, and  
752 deep-ocean ecosystems. *Proceedings of the National Academy of Sciences* 106, 19211-19218.

- 753 Soto, E.H., Paterson, G.L., Billett, D.S., Hawkins, L.E., Galéron, J., Sibuet, M., 2010. Temporal variability in  
754 polychaete assemblages of the abyssal NE Atlantic Ocean. *Deep Sea Research Part II: Topical Studies*  
755 *in Oceanography* 57, 1396-1405.
- 756 Walker, N.D., Wiseman Jr, W.J., Rouse Jr, L.J., Babin, A., 2005. Effects of river discharge, wind stress, and  
757 slope eddies on circulation and the satellite-observed structure of the Mississippi River plume.  
758 *Journal of Coastal Research*, 1228-1244.
- 759 Warwick, R., Clarke, K., 1995. New 'biodiversity' measures reveal a decrease in taxonomic distinctness  
760 with increasing stress. *Marine Ecology Progress Series* 129, 301-305.
- 761 Washburn, T., Rhodes, A.C., Montagna, P.A., 2016. Benthic taxa as potential indicators of a deep-sea oil  
762 spill. *Ecological Indicators* 71, 587-597.
- 763 Washburn, T.W., Reuscher, M.G., Montagna, P.A., Cooksey, C., Hyland, J.L., 2017. Macrobenthic  
764 community structure in the deep Gulf of Mexico one year after the Deepwater Horizon blowout.  
765 *Deep Sea Research Part I: Oceanographic Research Papers* 127, 21-30.
- 766 Wei, C.-L., Rowe, G.T., 2019. Productivity controls macrofauna diversity in the deep northern Gulf of  
767 Mexico. *Deep Sea Research Part I: Oceanographic Research Papers* 143, 17-27.
- 768 Wei, C.-L., Rowe, G.T., Escobar-Briones, E., Nunnally, C., Soliman, Y., Ellis, N., 2012. Standing Stocks and  
769 Body Size of Deep-sea Macrofauna: Predicting the Baseline of 2010 *Deepwater Horizon* Oil Spill in  
770 the Northern Gulf of Mexico. *Deep Sea Research Part I: Oceanographic Research Papers*.
- 771 Wei, C.-L., Rowe, G.T., Hubbard, G.F., Scheltema, A.H., Wilson, G.D., Petrescu, I., Foster, J.M., Wicksten,  
772 M.K., Chen, M., Davenport, R., 2010. Bathymetric zonation of deep-sea macrofauna in relation to  
773 export of surface phytoplankton production.
- 774 Wicksten, M.K., Packard, J.M., 2005. A qualitative zoogeographic analysis of decapod crustaceans of the  
775 continental slopes and abyssal plain of the Gulf of Mexico. *Deep Sea Research Part I: Oceanographic*  
776 *Research Papers* 52, 1745-1765.
- 777 Yang, T., Nigro, L.M., Gutierrez, T., Joye, S.B., Highsmith, R., Teske, A., 2016. Pulsed blooms and  
778 persistent oil-degrading bacterial populations in the water column during and after the Deepwater  
779 Horizon blowout. *Deep Sea Research Part II: Topical Studies in Oceanography* 129, 282-291.
- 780 Young, D.K., Richardson, M.D., 1998. Effects of waste disposal on benthic faunal succession on the  
781 abyssal seafloor. *Journal of Marine Systems* 14, 319-336.
- 782

Table 1. Summary of time-series sampling Sites in the DeSoto Canyon and the adjacent non-canyon continental slope. An “X” indicates samples were collected in that year at that station.

| Site  | Latitude | Longitude | Depth (m) | Time Points |      |      |
|-------|----------|-----------|-----------|-------------|------|------|
|       |          |           |           | 2012        | 2013 | 2014 |
| S42   | 28.2528  | -86.4216  | 770       | -           | X    | X    |
| NT800 | 28.056   | -85.9335  | 800       | -           | X    | X    |
| PCB06 | 28.99451 | -87.4574  | 1100      | X           | X    | X    |
| XC2   | 29.1210  | -87.8655  | 1137      | X           | -    | X    |
| XC3   | 28.9762  | -87.8683  | 1510      | X           | -    | X    |
| S36   | 28.91851 | -87.6722  | 1834      | X           | X    | X    |
| XC4   | 28.6365  | -87.8685  | 2200      | X           | X    | X    |

Table 2. Proportions of major macrofaunal taxa across pooled replicates of DeSoto Canyon sites (PCB06, XC2, XC3, S36, and XC4) and adjacent slope sites (S42 and NT800) by year.

|                 | S42    |        | NT800  |        | PCB06  |        |        | XC2    |        | XC3    |        | S36    |        |        | XC4    |        |        |
|-----------------|--------|--------|--------|--------|--------|--------|--------|--------|--------|--------|--------|--------|--------|--------|--------|--------|--------|
|                 | 2013   | 2014   | 2013   | 2014   | 2012   | 2013   | 2014   | 2012   | 2014   | 2012   | 2014   | 2012   | 2013   | 2014   | 2012   | 2013   | 2014   |
| Amphipoda       | 4.84%  | 3.42%  | 3.53%  | 3.47%  | 1.64%  | 3.14%  | 3.28%  | 5.82%  | 3.87%  | 2.16%  | 0.16%  | 2.24%  | 2.45%  | 4.88%  | 0.79%  | 0.49%  | 1.46%  |
| Tanaidacea      | 8.87%  | 7.12%  | 12.94% | 10.92% | 8.22%  | 8.45%  | 7.53%  | 7.15%  | 5.66%  | 5.30%  | 8.21%  | 10.37% | 8.82%  | 7.20%  | 15.35% | 7.80%  | 6.83%  |
| Other Crustacea | 5.91%  | 6.55%  | 6.27%  | 4.22%  | 5.98%  | 6.29%  | 4.05%  | 4.83%  | 2.62%  | 4.52%  | 2.09%  | 6.91%  | 8.58%  | 9.51%  | 7.48%  | 8.78%  | 11.71% |
| Aplacophora     | 4.30%  | 5.41%  | 3.53%  | 3.97%  | 5.53%  | 1.57%  | 3.47%  | 11.65% | 8.29%  | 1.57%  | 1.29%  | 1.42%  | 1.96%  | 0.51%  | 0.00%  | 0.49%  | 0.98%  |
| Bivalvia        | 5.65%  | 5.98%  | 7.45%  | 4.71%  | 8.37%  | 7.07%  | 8.88%  | 9.15%  | 7.60%  | 11.79% | 13.53% | 5.69%  | 4.66%  | 6.94%  | 5.51%  | 7.32%  | 6.34%  |
| Other Mollusca  | 2.96%  | 0.85%  | 3.92%  | 1.24%  | 0.30%  | 1.96%  | 2.12%  | 0.83%  | 0.41%  | 0.00%  | 1.93%  | 0.61%  | 1.96%  | 2.83%  | 0.79%  | 2.44%  | 0.49%  |
| Nemertea        | 4.57%  | 5.70%  | 4.31%  | 3.47%  | 2.39%  | 5.30%  | 4.83%  | 2.50%  | 3.73%  | 1.77%  | 4.51%  | 4.27%  | 2.94%  | 4.11%  | 3.54%  | 5.37%  | 4.39%  |
| Polychaeta      | 55.91% | 57.83% | 51.37% | 59.31% | 60.69% | 60.90% | 59.85% | 54.24% | 63.81% | 65.23% | 65.54% | 63.82% | 64.71% | 59.64% | 65.75% | 65.37% | 65.37% |
| Other Annelida  | 1.34%  | 1.14%  | 0.78%  | 1.49%  | 2.24%  | 1.18%  | 0.77%  | 0.83%  | 0.83%  | 3.54%  | 1.29%  | 2.24%  | 1.23%  | 1.54%  | 0.39%  | 1.95%  | 0.49%  |
| Miscellaneous   | 5.65%  | 5.98%  | 5.88%  | 7.20%  | 4.63%  | 4.13%  | 5.21%  | 3.00%  | 3.18%  | 4.13%  | 1.45%  | 2.44%  | 2.70%  | 2.83%  | 0.39%  | 0.00%  | 1.95%  |

Table 3. Feeding guild composition for all Sites and time points pooled across replicates.

|                   | S42    |        | NT800  |        | PCB06  |        |        | XC2    |        | XC3    |        | S36    |        |        | XC4    |        |        |
|-------------------|--------|--------|--------|--------|--------|--------|--------|--------|--------|--------|--------|--------|--------|--------|--------|--------|--------|
|                   | 2013   | 2014   | 2013   | 2014   | 2012   | 2013   | 2014   | 2012   | 2014   | 2012   | 2014   | 2012   | 2013   | 2014   | 2012   | 2013   | 2014   |
| Carnivore         | 14.52% | 14.25% | 12.94% | 12.16% | 13.30% | 16.70% | 18.73% | 15.14% | 19.06% | 9.23%  | 9.66%  | 11.38% | 11.03% | 12.08% | 7.87%  | 11.22% | 12.20% |
| Deposit           | 65.05% | 65.53% | 67.06% | 66.00% | 69.36% | 64.24% | 61.58% | 68.22% | 65.88% | 65.62% | 65.70% | 63.41% | 66.91% | 62.47% | 75.59% | 70.24% | 73.17% |
| Omnivore          | 14.25% | 11.40% | 11.37% | 12.90% | 7.92%  | 12.38% | 9.85%  | 9.65%  | 8.43%  | 16.50% | 11.59% | 17.48% | 14.71% | 16.97% | 7.87%  | 10.73% | 7.32%  |
| Suspension feeder | 3.23%  | 5.13%  | 5.10%  | 7.69%  | 6.88%  | 5.11%  | 6.76%  | 5.32%  | 5.80%  | 6.29%  | 4.03%  | 7.32%  | 6.62%  | 7.46%  | 7.87%  | 7.32%  | 5.37%  |
| Chemo-symbiotic   | 2.96%  | 3.70%  | 3.53%  | 1.24%  | 2.54%  | 1.57%  | 3.09%  | 1.66%  | 0.83%  | 2.36%  | 9.02%  | 0.41%  | 0.74%  | 1.03%  | 0.79%  | 0.49%  | 1.95%  |



Table 4. PERMANOVA results for the test of macrofauna community structure among and between time points from 2012 – 2014 across all sites. Bolded values indicate significant differences.

|                     |    | Community Structure |          |              |       | Feeding guild Structure |          |              |       |
|---------------------|----|---------------------|----------|--------------|-------|-------------------------|----------|--------------|-------|
| Source              | df | SS                  | Pseudo-F | P(perm)      | perms | SS                      | Pseudo-F | P(perm)      | perms |
| Time point          | 2  | 1990.2              | 1.343    | 0.17         | 998   | 79.122                  | 0.60557  | 0.729        | 999   |
| Site                | 6  | 19489               | 5.9327   | <b>0.001</b> | 997   | 4697.8                  | 15.077   | <b>0.001</b> | 999   |
| Time point x Site** | 8  | 5929.9              | 1.3539   | 0.004        | 999   | 522.77                  | 1.2583   | 0.208        | 998   |
| Res                 | 33 | 18067               |          |              |       | 1713.7                  |          |              |       |
| Total               | 49 | 46737               |          |              |       | 7330                    |          |              |       |

Table 5. Summary of PERMANOVA results for the benthic polychaete/amphipod ratio. Sample size n = 3 for all groups in pairwise comparisons except for NT800 in 2012 where n = 2.

|                           | df       | SS     | Pseudo-F | p-value      |         |       |
|---------------------------|----------|--------|----------|--------------|---------|-------|
| Time Point                | 2        | 986.01 | 1.0892   | 0.381        |         |       |
| Station                   | 6        | 8018.4 | 2.9524   | <b>0.001</b> |         |       |
| Time Point x Station      | 8        | 5924.6 | 1.6361   | <b>0.021</b> |         |       |
| Residual                  | 33       | 14937  |          |              |         |       |
| Total                     | 49       | 30137  |          |              |         |       |
| Site pairwise comparisons |          |        |          |              |         |       |
|                           |          | 2012   |          | 2013         |         | 2014  |
| Groups                    | t        | P(MC)  | t        | P(MC)        | t       | P(MC) |
| S42, NT800                | -        | -      | 0.65053  | 0.569        | 0.16321 | 0.914 |
| S42, XC2                  | -        | -      | -        | -            | 0.5     | 0.661 |
| S42, XC3                  | -        | -      | -        | -            | 1.511   | 0.155 |
| NT800, XC2                | -        | -      | -        | -            | 0.65157 | 0.568 |
| NT800, XC3                | -        | -      | -        | -            | 1.5468  | 0.144 |
| XC2, XC3                  | 2.2834   | 0.075  | -        | -            | 1.532   | 0.153 |
| PCB06, S36                | 0.70725  | 0.523  | 0.42152  | 0.702        | 0.81779 | 0.448 |
| PCB06, XC4                | 5.017E-2 | 0.993  | 1.4059   | 0.226        | 1.5176  | 0.192 |
| PCB06, XC2                | 2.2968   | 0.062  | -        | -            | 0.45772 | 0.662 |
| PCB06, XC3                | 0.11061  | 0.97   | -        | -            | 1.5417  | 0.131 |
| PCB06, S42                | -        | -      | 1.2834   | 0.272        | 0.24232 | 0.869 |
| PCB06, NT800              | -        | -      | 0.40902  | 0.709        | 0.18936 | 0.872 |
| S36, XC4                  | 0.70043  | 0.511  | 1.8634   | 0.125        | 1.7718  | 0.141 |
| S36, XC2                  | 2.3285   | 0.086  | -        | -            | 1.107   | 0.353 |
| S36, XC3                  | 0.61287  | 0.56   | -        | -            | 1.5353  | 0.137 |
| S36, S42                  | -        | -      | 4.0848   | <b>0.016</b> | 1.2571  | 0.677 |
| S36, NT800                | -        | -      | 1.0185   | 0.37         | 1.6602  | 0.533 |
| XC4, XC2                  | 2.176    | 0.087  | -        | -            | 1.2071  | 0.303 |
| XC4, XC3                  | 0.14419  | 0.929  | -        | -            | 1.4755  | 0.172 |
| XC4, S42                  | -        | -      | 3.9943   | <b>0.013</b> | 1.2571  | 0.299 |
| XC4, NT800                | -        | -      | 1.7854   | 0.159        | 1.6602  | 0.162 |

Table 6. Relative multivariate dispersion of macrofaunal communities at each site by year.

| Site                 | 2012     | 2013     | 2014     |
|----------------------|----------|----------|----------|
| S42                  | -        | 0.867    | 1.053    |
| NT800                | -        | 1.24     | 1.2      |
| PCB06                | 0.533    | 0.373    | 0.733    |
| S36                  | 1.173    | 1.52     | 1.24     |
| XC2                  | 0.627    | -        | 0.12     |
| XC3                  | 1.28     | -        | 0.413    |
| XC4                  | 1.8      | 1.293    | 1.693    |
| Pairwise comparisons | 2012 IMD | 2013 IMD | 2014 IMD |
| S42, NT800           | -        | -1       | -0.111   |
| S42, XC2             | -        | -        | 1        |
| S42, XC3             | -        | -        | 0.778    |
| NT800, XC2           | -        | -        | 1        |
| NT800, XC3           | -        | -        | 0.556    |
| XC2, XC3             | -1       |          | -0.556   |
| PCB06, S36           | -0.778   | -1       | -0.778   |
| PCB06, XC4           | -1       | -1       | -1       |
| PCB06, XC2           | -0.556   | -        | 1        |
| PCB06, XC3           | -1       | -        | 0.556    |
| PCB06, S42           | -        | -0.778   | -0.556   |
| PCB06, NT800         | -        | -1       | -0.556   |
| S36, XC4             | -1       | 0.111    | -0.778   |
| S36, XC2             | 0.778    | -        | 1        |
| S36, XC3             | -0.111   | -        | 0.778    |
| S36, S42             | -        | 1        | 0.333    |
| S36, NT800           | -        | 0.333    | -0.111   |
| XC4, XC2             | 1        | -        | 1        |
| XC4, XC3             | 0.778    | -        | 1        |
| XC4, S42             | -        | 0.556    | 1        |
| XC4, NT800           | -        | 0.333    | 0.333    |

Figure 1A) Map of DeSoto Canyon and open slope time-series sites. Sites were sampled from 2012 – 2014 in the DeSoto Canyon and 2013 – 2014 on the adjacent slope. The light gray overlay is the maximum extent of the surface petroleum slick (ERMA, 2019). B) Time-series sites in relation to sediment radiocarbon contoured with the Inverse Distance Weighting method with data from Chanton et al. (2014).

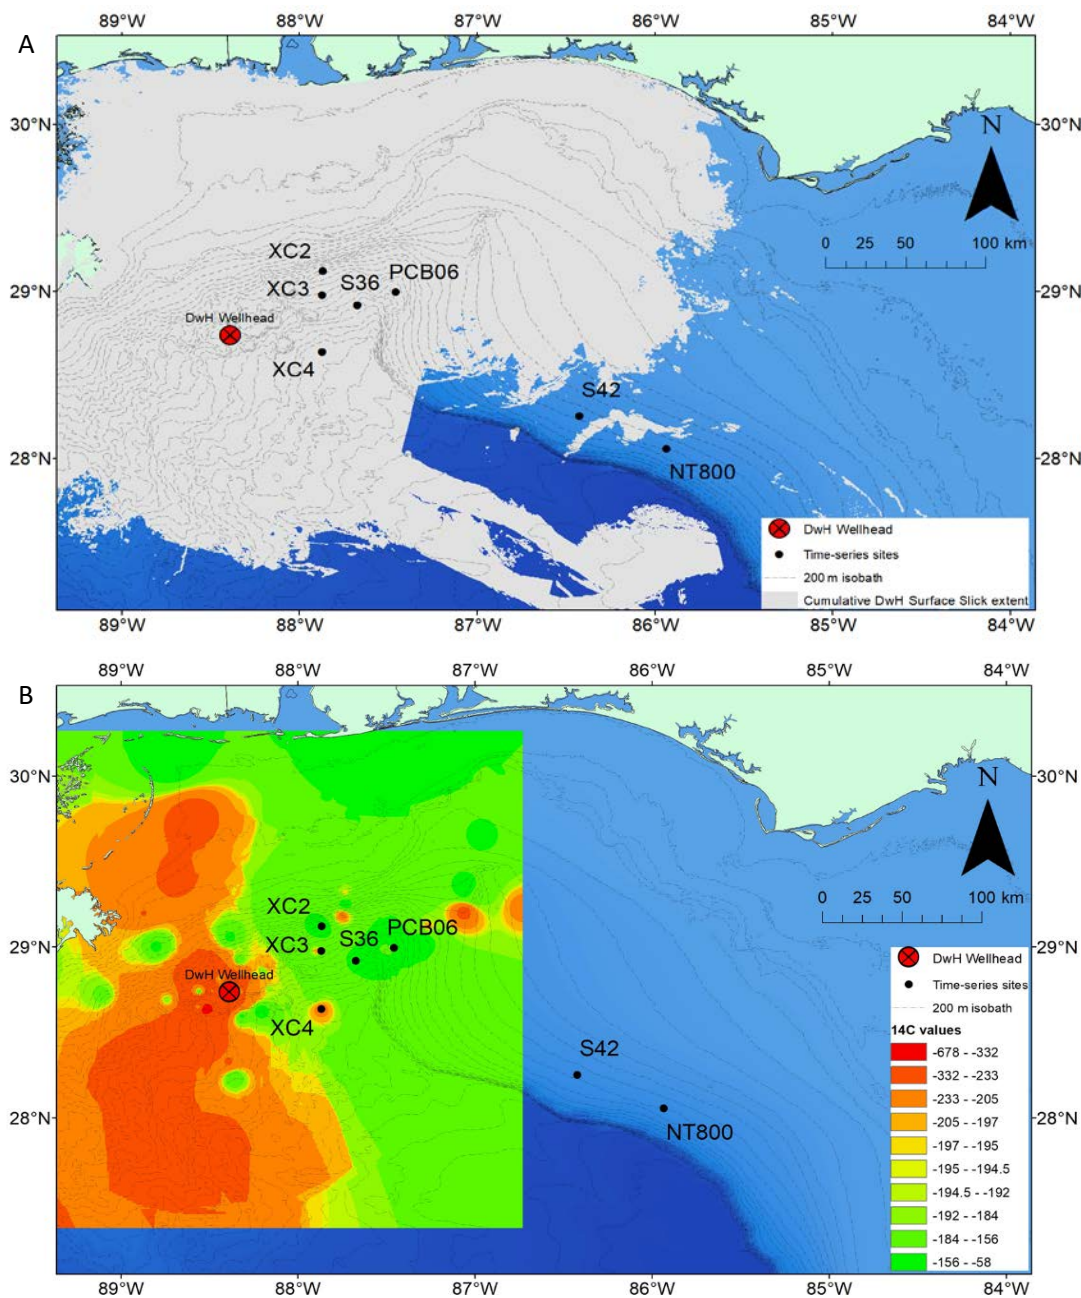

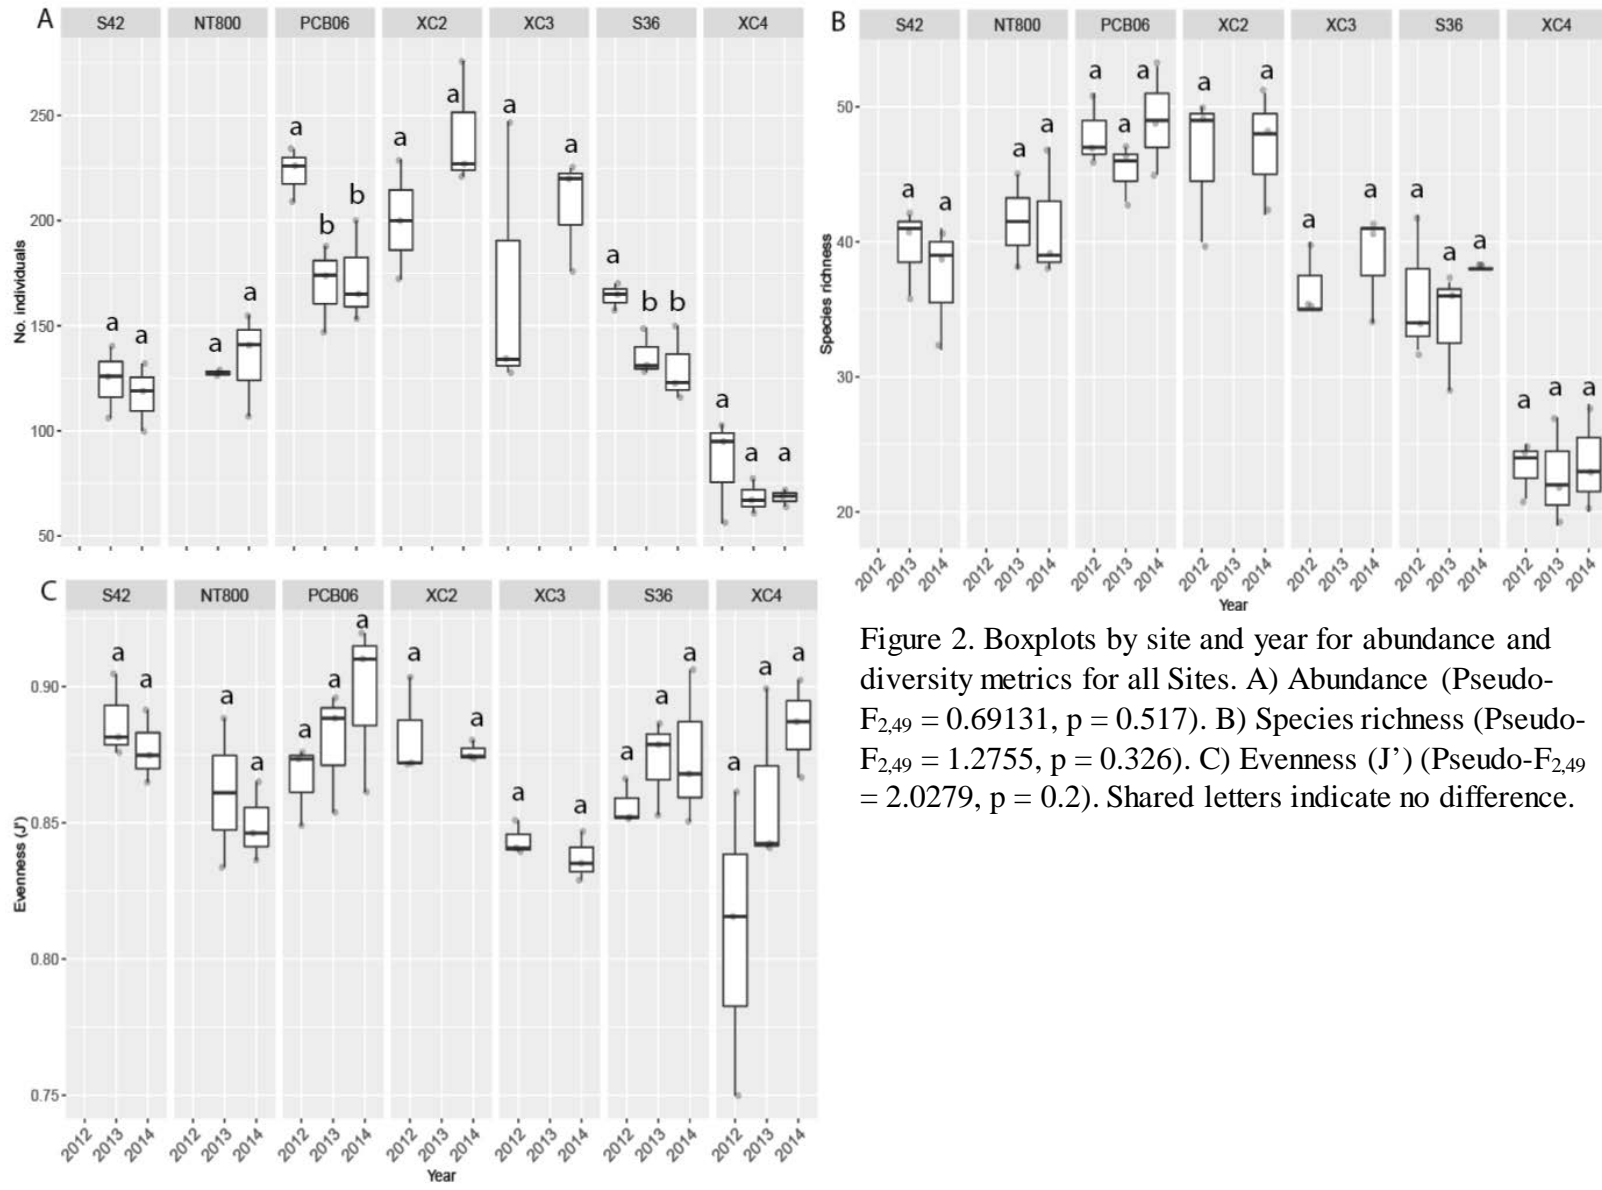

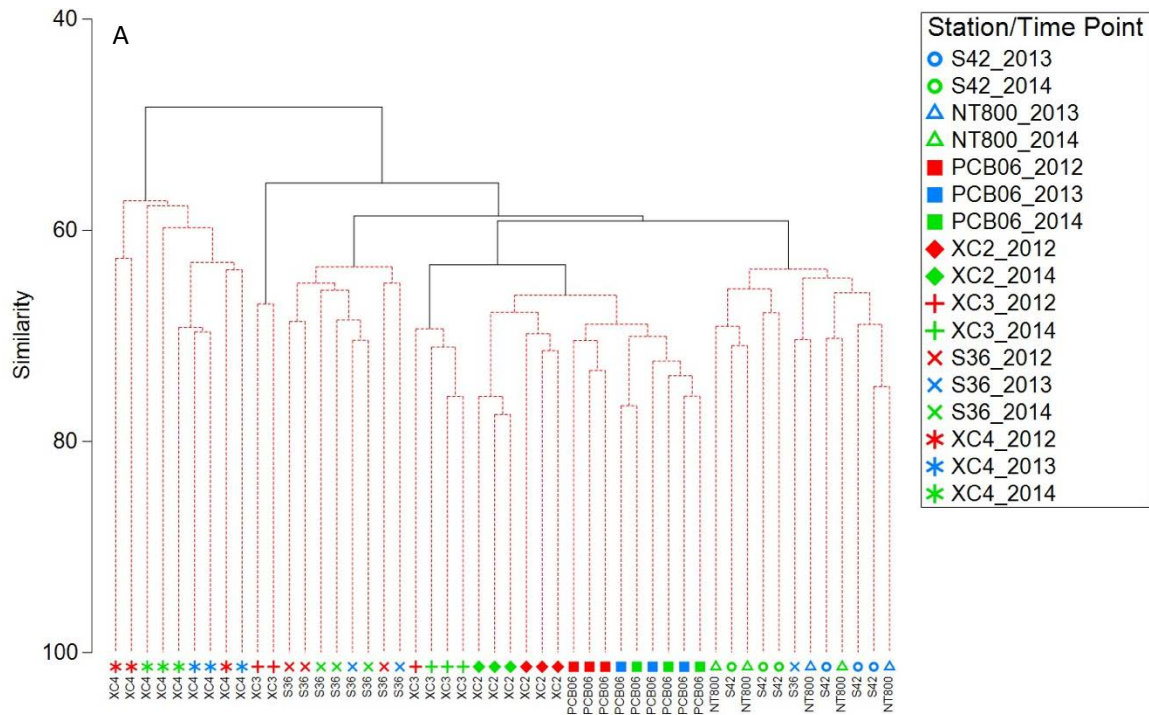

Figure 3A) Cluster analysis based on Bray-Curtis similarities of macrofauna abundance of DeSoto Canyon time-series sites and the open slope sites from 2012 – 2014. B) Non-metric multidimensional scaling of macrofauna community structure. C) Pooled samples for each time point at each Site with trajectory overlays from 2012-2014.

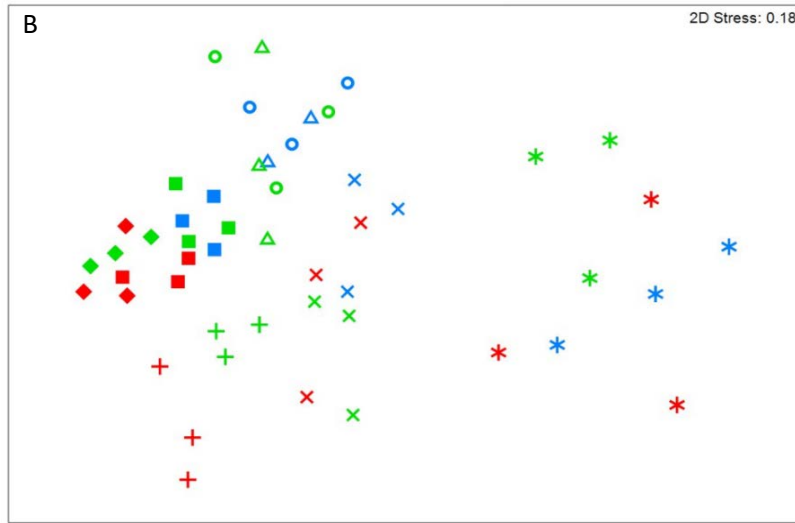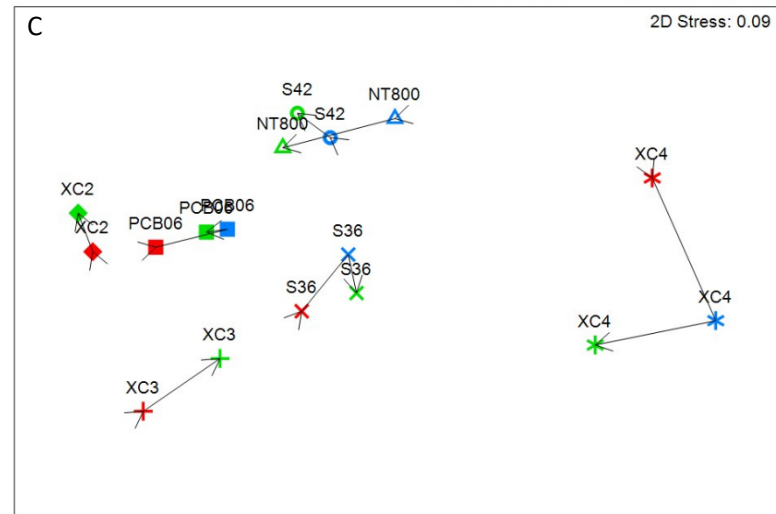

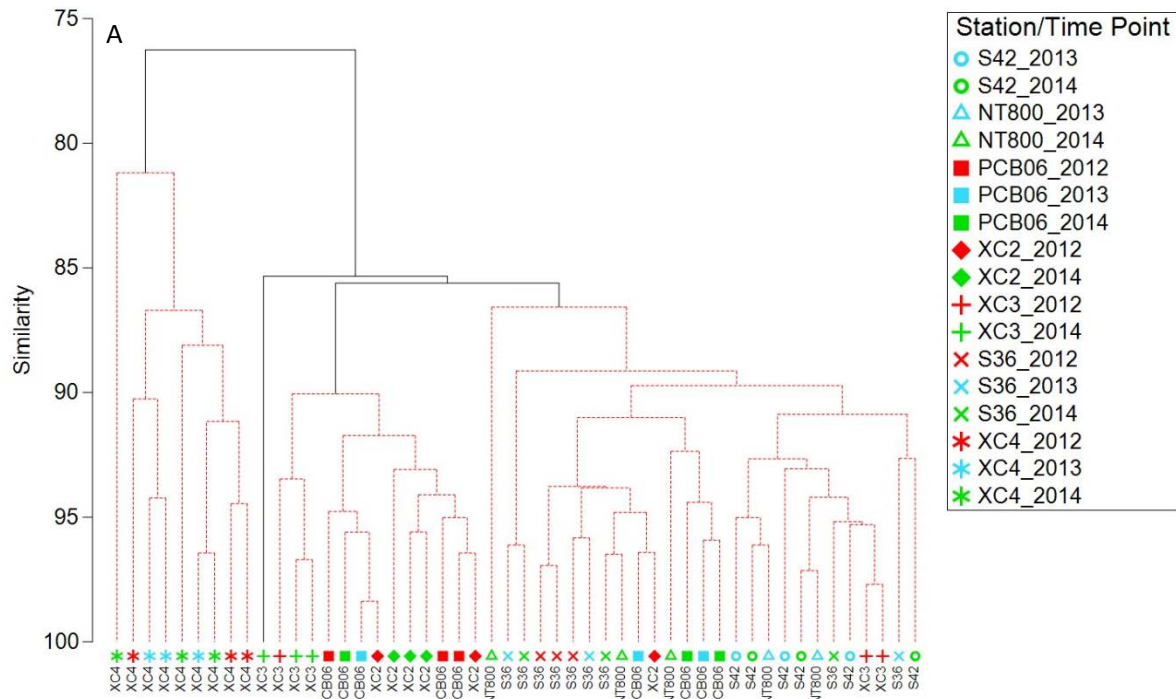

Figure 4A) Cluster analysis based on Bray-Curtis similarities of macrofauna feeding guilds for DeSoto Canyon time-series sites and open slope sites from 2012 – 2014. B) Non-metric multidimensional scaling of feeding guild structure. C) Pooled samples for each time point at each Site with trajectory overlays from 2012-2014.

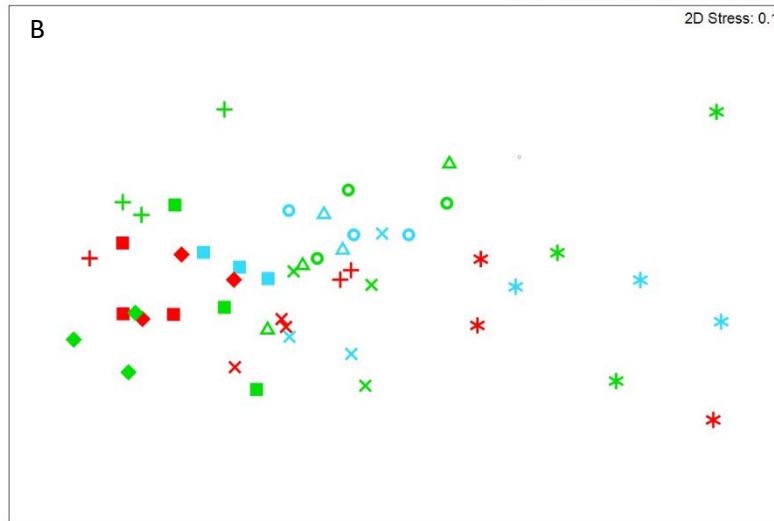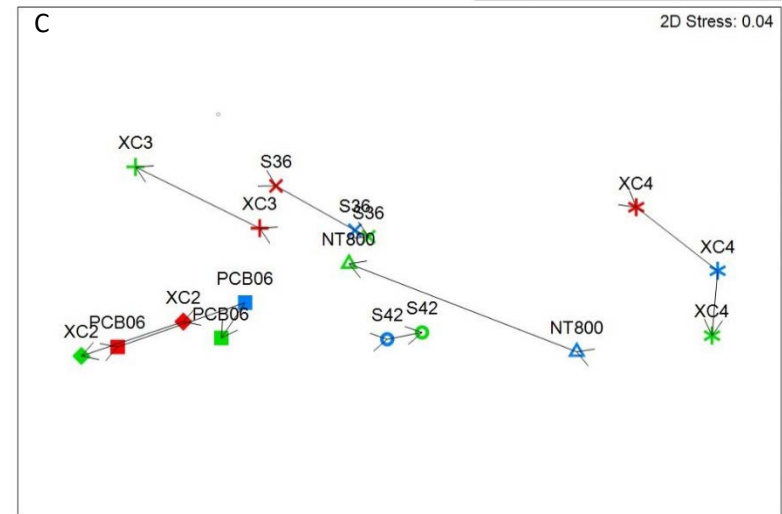

Figure 5. Benthic polychaete/amphipod ratio (BPA) across time for all sites (Pseudo- $F_{2,49} = 1.0892$ ,  $p = 0.381$ ). No amphipods occurred in two replicates for XC3 in 2014 and therefore it was excluded from analysis but the polychaete abundance for 2014 is plotted for comparison. Shared letters indicate no difference.

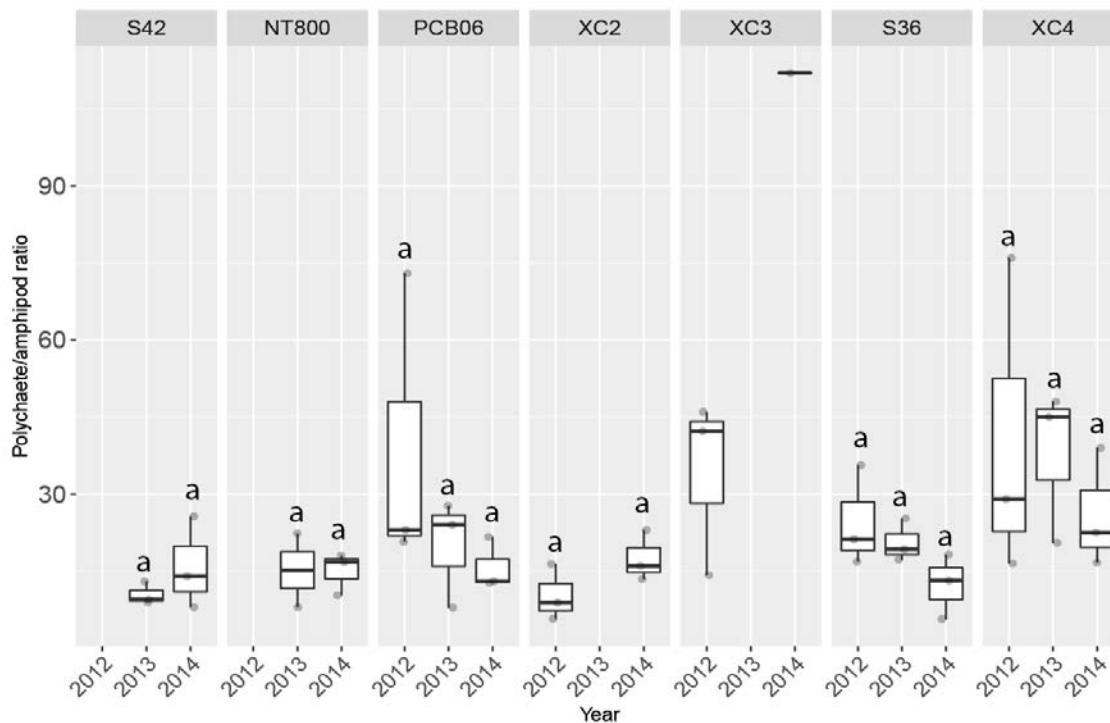



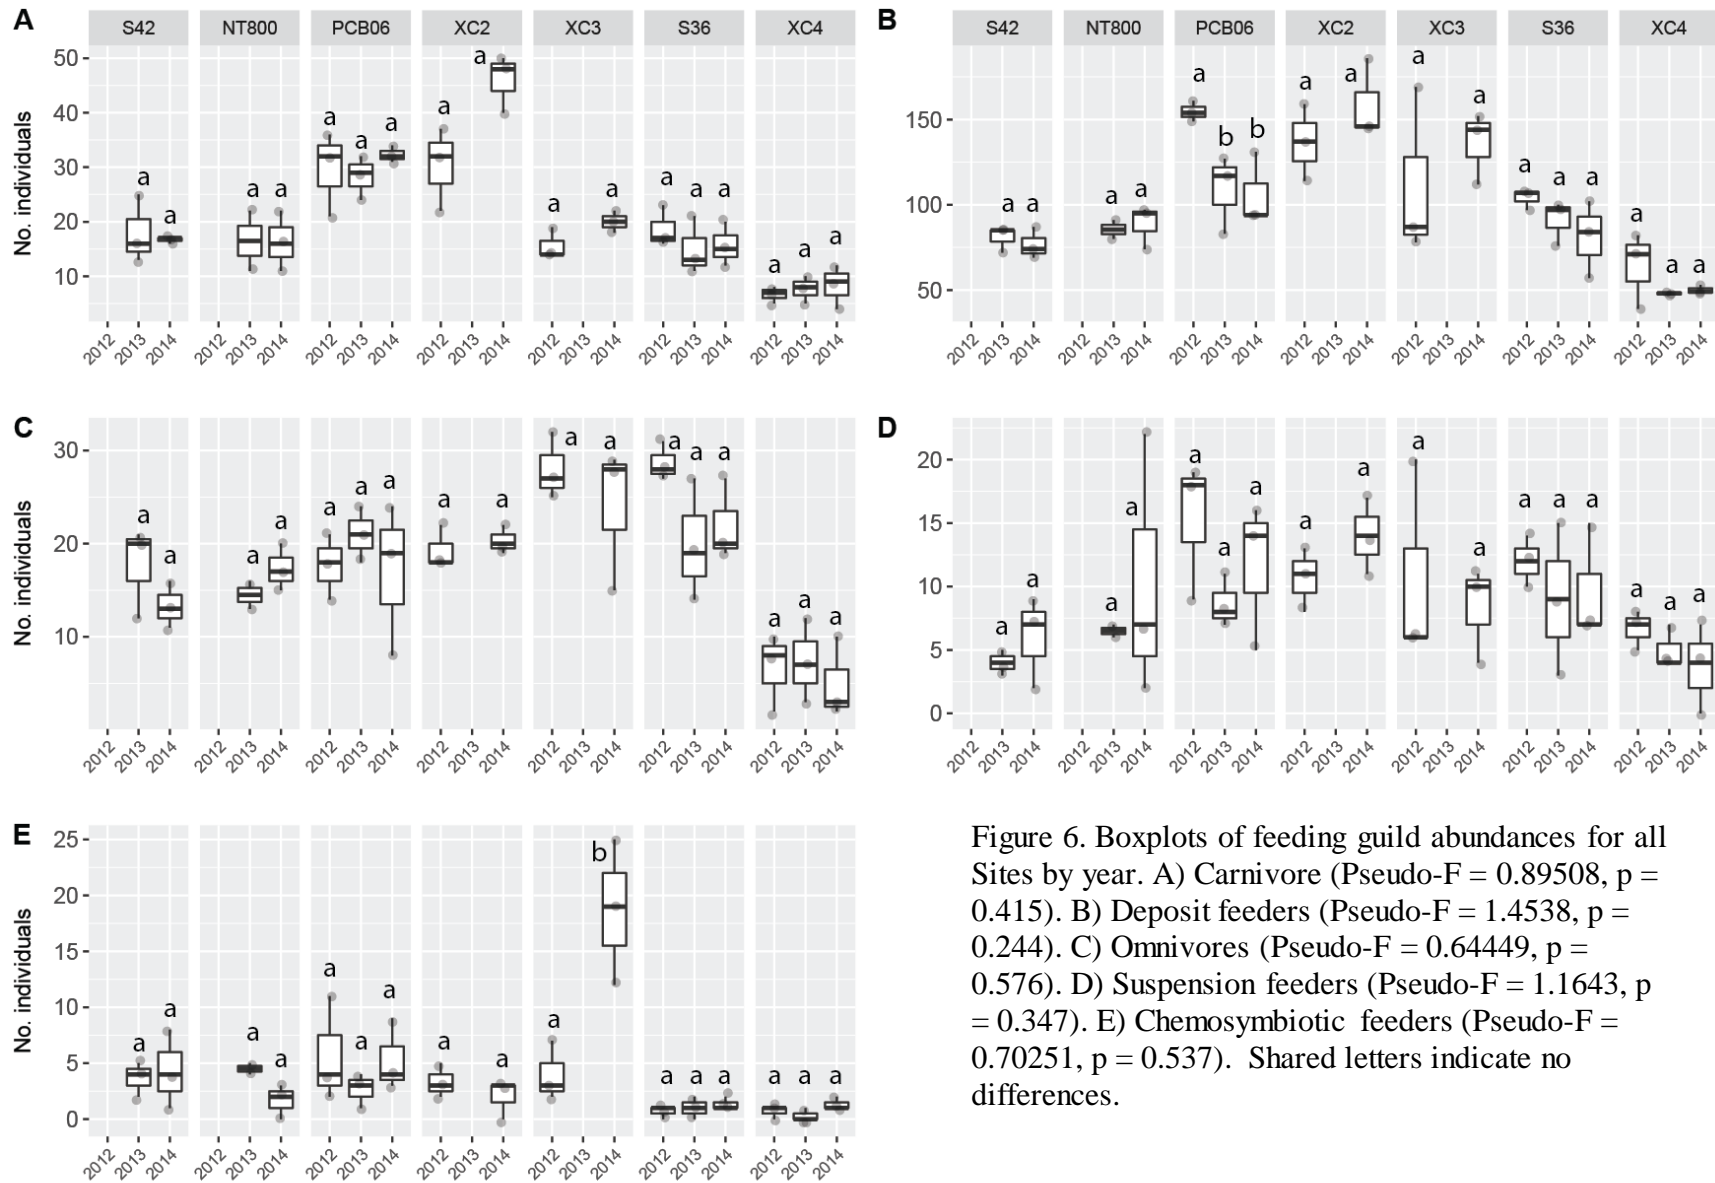

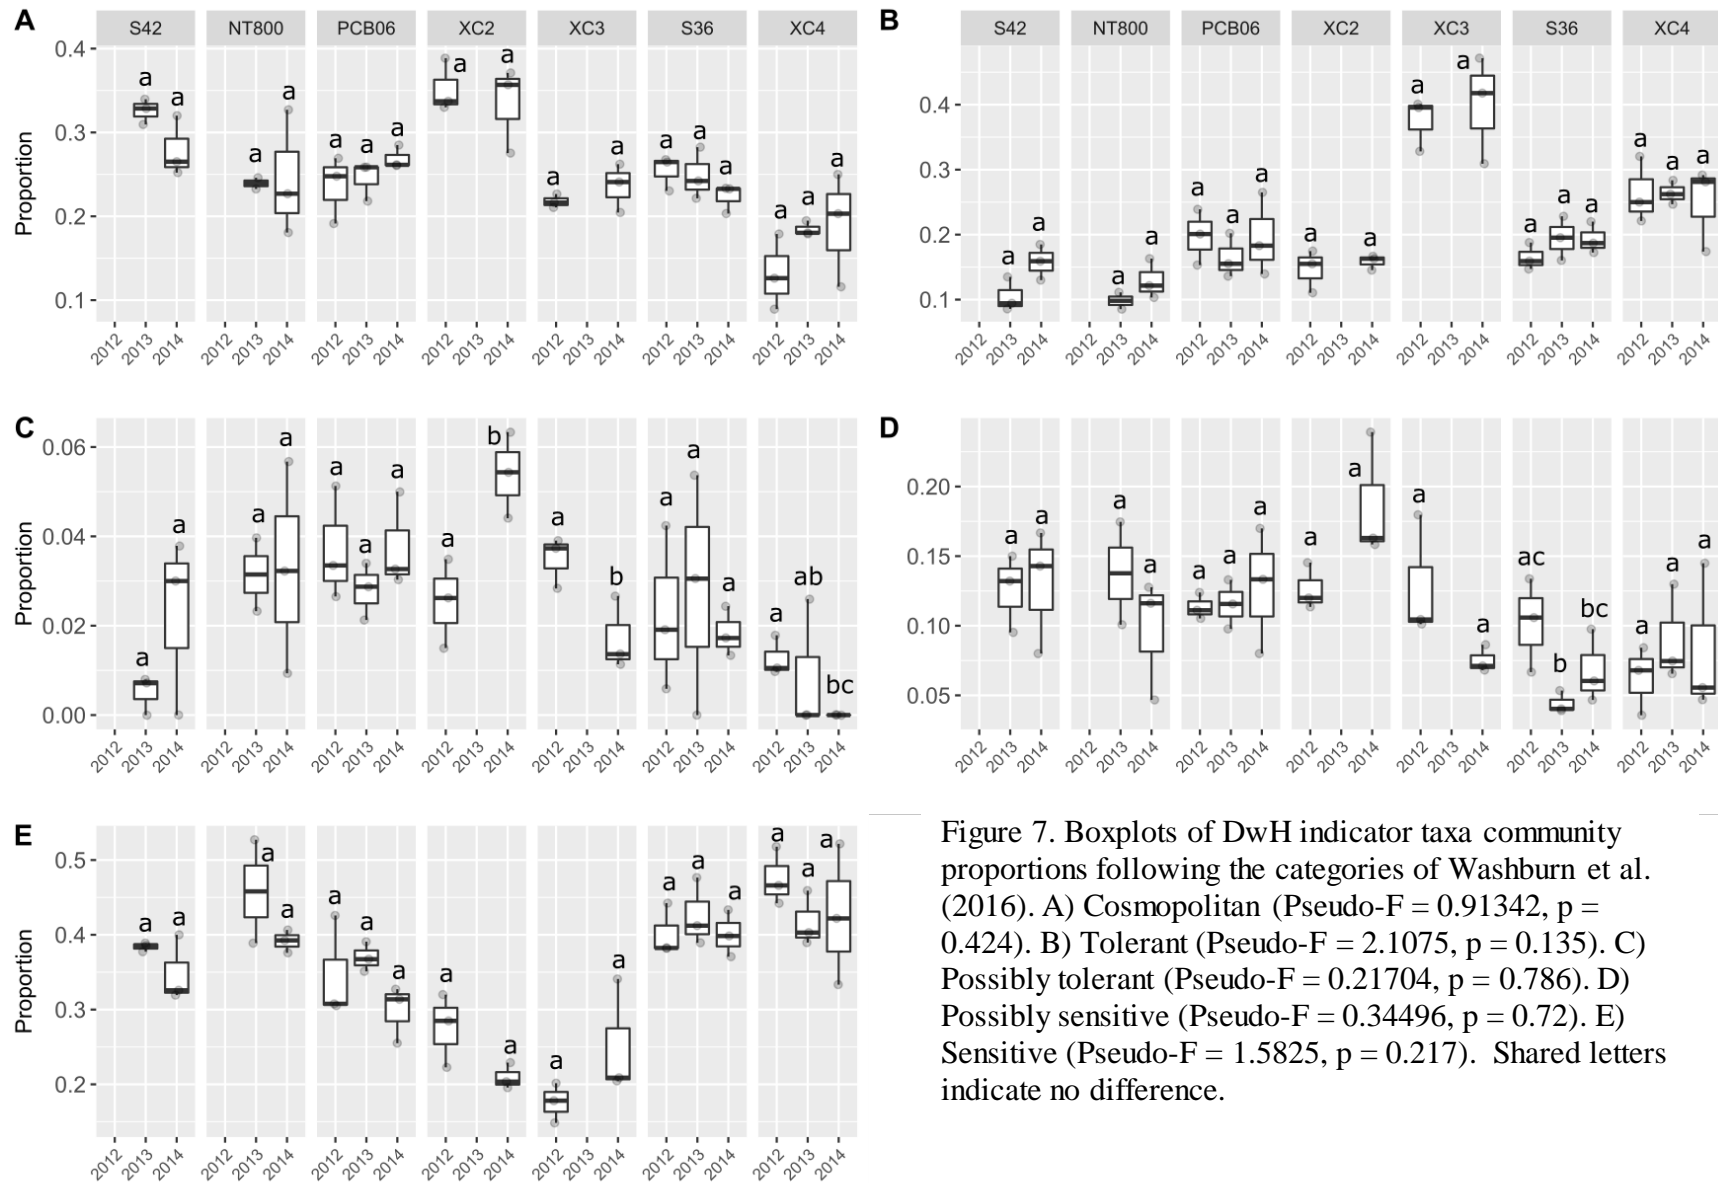

Figure 7. Boxplots of DwH indicator taxa community proportions following the categories of Washburn et al. (2016). A) Cosmopolitan (Pseudo-F = 0.91342,  $p = 0.424$ ). B) Tolerant (Pseudo-F = 2.1075,  $p = 0.135$ ). C) Possibly tolerant (Pseudo-F = 0.21704,  $p = 0.786$ ). D) Possibly sensitive (Pseudo-F = 0.34496,  $p = 0.72$ ). E) Sensitive (Pseudo-F = 1.5825,  $p = 0.217$ ). Shared letters indicate no difference.
